# Supplementary material
Source: PubMed Central journal article supplement (PMC8087210)
Supplement: jci-131-132305-s107.pdf [file jci-131-132305-s107.pdf]

## SUPPLEMENTARY METHODS

**Biochemical assays.** Serum alanine aminotransferase (ALT), alkaline phosphatase (ALP), and total bilirubin (TBIL) levels were determined using a Catalyst Dx Chemistry Analyzer (IDEXX Laboratories, Westbrook, ME). Tissue bile acid concentration was evaluated using the Total Bile Acid Assays and following manufacturer's instructions (Cell Biolabs Inc., CA).

**Immunohistochemistry.** Paraformaldehyde fixed (4%) and paraffin embedded 4  $\mu$ m thick liver sections were used. Section were deparaffinized, and antigen retrieval was performed using heat-mediated epitope retrieval solution (ThermoFisher Scientific). Sections were blocked for one hour in PBS containing 3% normal goat serum. Slides were incubated overnight with primary antibodies listed in Supplementary Table 1. Conventional and multiplex immunostaining showing more than three markers was performed as previously described, and images were analyzed using the trainable classification software Ilastik (v 1.3.3) (Berg et al., Nat Methods. 2019 Dec;16(12):1226-1232. doi: 10.1038/s41592-019-0582-9. Epub 2019 Sep 30) and CellProfiler v3.1.9 (Lamprecht et al., Biotechniques. 2007 Jan;42(1):71-5. doi: 10.2144/000112257) (Guillot et al., Cancers (Basel). 2020 Aug 28;12(9):E2449. doi: 10.3390/cancers12092449).

**TUNEL staining.** Liver injury was assessed by Terminal deoxynucleotidyl transferase dUTP nick end labeling (TUNEL) staining on formaldehyde fixed paraffin embedded tissue sections as per manufacturer's instructions and revealed either after HRP based coloration (ApopTag Peroxidase In Situ Apoptosis Detection Kit, Millipore Sigma, St. Louis, MO) or by fluorescence (DeadEnd Fluorometric TUNEL System, Promega, Madison, WI).

**Liver microcirculation (additional information).** Briefly, liver was exposed and scanned by using moorFLPI-2 blood flow imager (Moor Instruments, Wilmington, DE, USA) to determine the red blood cell velocity in 1.5% isoflurane anesthetized mice with core temperatures maintained at  $37.2 \pm 0.1^\circ\text{C}$ . Hepatic microcirculation was assessed in a 5 mm diametric region of both left and medial lobes placed onto the free part of the liver lobes, and quantified by using the Moor Instruments analysis software. Data are expressed in arbitrary units.

**Non-parenchymal cell isolation and FACS analysis.** For non-parenchymal collagen-

expressing cell isolation, livers from tamoxifen and ILY injected *ihCD59<sup>BEC-TG</sup> Coll1<sup>GFP</sup>* mice were perfused with GBSS containing 0.5 g/L collagenase IV (Millipore Sigma, St. Louis, MO), collected and minced with scissors, and further digested for 20 minutes at 37°C under agitation in GBSS containing 0.5 g/L collagenase IV and 0.5 g/L pronase (Millipore Sigma, St. Louis, MO). Cells were then passed through a 70 µm cell strainer, and HCs were removed after three consecutive low speed centrifugations (60 g 5 minutes). Red blood cells were lysed using ACK Lysing Buffer (ThermoFisher Scientific, Carlsbad, CA). For non-parenchymal immune cell isolation, livers from *ihCD59* or *ihCD59<sup>BEC-TG</sup>* mice were excised and cut into small pieces using scissors, before being forced through a 100 µm and a 70 µm cell strainer to obtain single cell suspensions. Hepatocytes were pelleted by low speed centrifugation (60 g 5 minutes) and discarded. Supernatant was centrifuged for 10 minutes at 400 g and pellet was resuspended in 37.5% Percoll solution containing 100 U/mL heparin and centrifuged at 850 g for 30 minutes with the off-brake setting. Red blood cells were lysed using ACK Lysing Buffer (ThermoFisher Scientific, Carlsbad, CA). Pellet was then resuspended, and cells were stained for flow cytometry using fluorochrome-conjugated antibodies listed in Supplementary Table 1 and diluted in PBS+2% FBS.

**Quantitative RT-PCR.** Total RNA was extracted from snap-frozen liver tissue or cell lysates using the RNeasy Mini Kit (Qiagen, Germantown, MD), following manufacturer's instructions. High-Capacity cDNA Reverse Transcription Kit (ThermoFisher Scientific, Carlsbad, CA) was used for reverse transcription. Real-time PCR was performed on a QuantStudio 6 Flex Real-Time PCR System (ThermoFisher Scientific, Carlsbad, CA), using BrightGreen 2X qPCR MasterMix-ROX (Applied Biological Materials Inc., Richmond, BC). Oligonucleotides used for PCR amplification are listed in Supplementary Table 3.

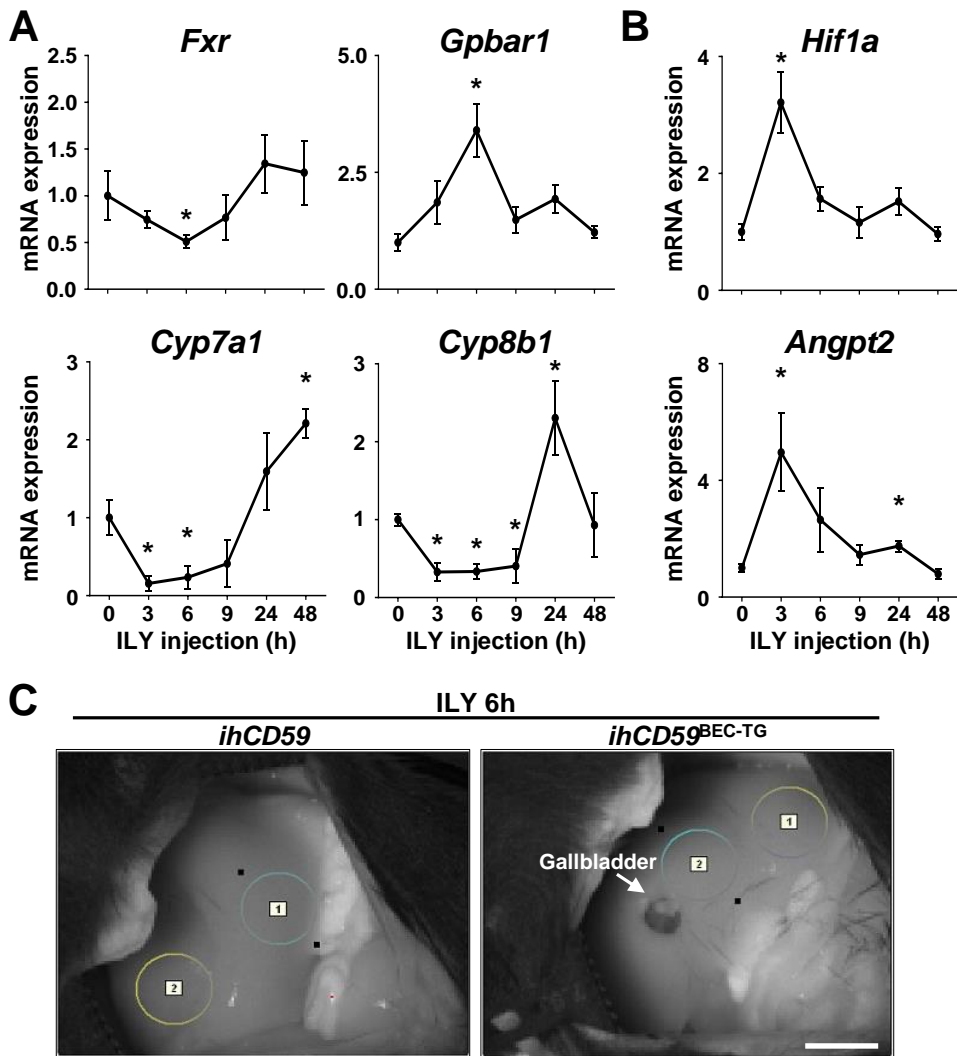

### Supplementary Figure 1: Acute BEC death induces cholestasis and liver ischemia

*ihCD59* and *ihCD59<sup>BEC-TG</sup>* mice were intraperitoneally injected with Tamoxifen (50 mg/kg) to induce hCD59 expression in Sox9<sup>+</sup> cells, every two days for a total of three injections. Following one-week tamoxifen wash-out period, ILY was injected intravenously (140  $\mu$ g/kg). Liver samples were collected at the indicated time points post ILY injection for qRT-PCR. **(A)** Alternative representation of quantitative RT-PCR data depicted in Figure 1D (n=3-7). **(B)** Hypoxia-inducible factor 1-alpha (*Hif1a*) and Angiotensin 2 (*Angpt2*) gene expression were assessed. Data are represented as mean  $\pm$  SEM. \**p*<0.05 as compared to ILY injected *ihCD59* mice (n=3-6 per group). **(C)** Representative grayscale images corresponding to the flux images displayed in Figure 1E, showing the areas of interest (circled and labelled 1 and 2) used for liver blood microcirculation measurements. Scale bar: 5 mm.

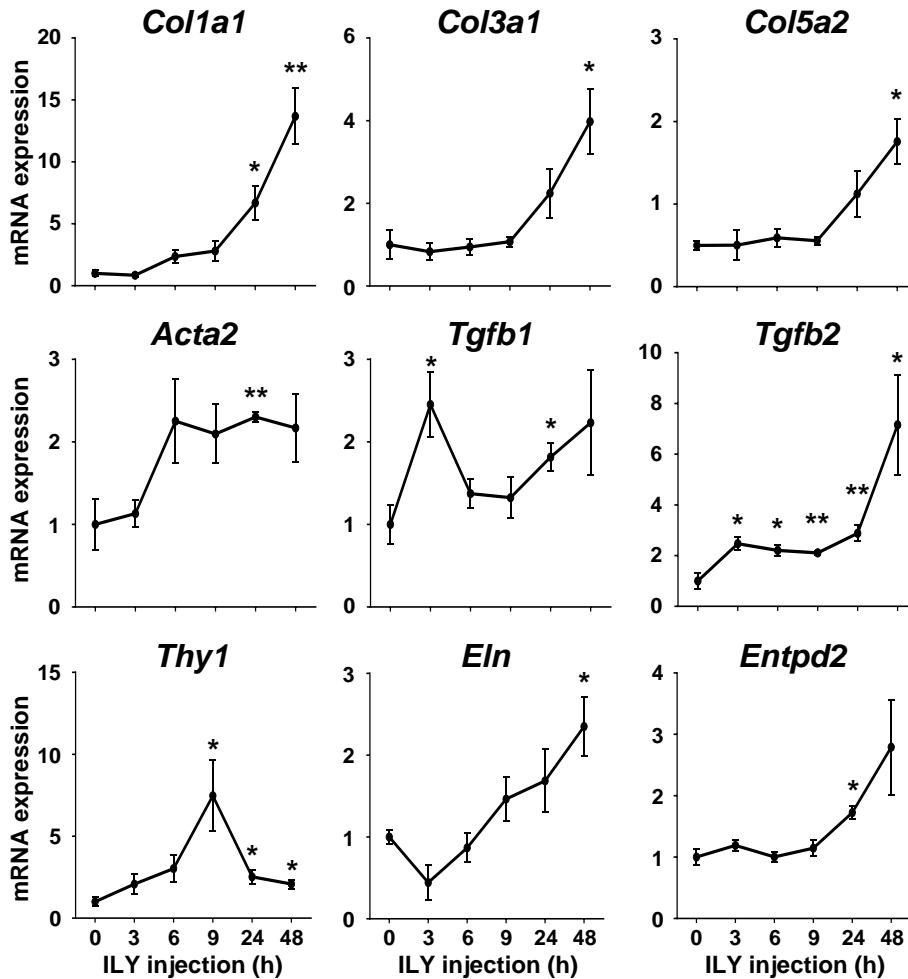

**Supplementary Figure 2: Fibrogenesis accompanies bile duct repair after acute injury**

*ihCD59* and *ihCD59*<sup>BEC-TG</sup> mice were treated as described in Supplementary Figure 1. Relative mRNA expression of fibrogenesis-associated genes depicted in Figure 2D. Data are represented as mean  $\pm$  SEM. \* $p < 0.05$ ; \*\* $p < 0.01$  as compared to *ihCD59* mice (n=3-7 per group).

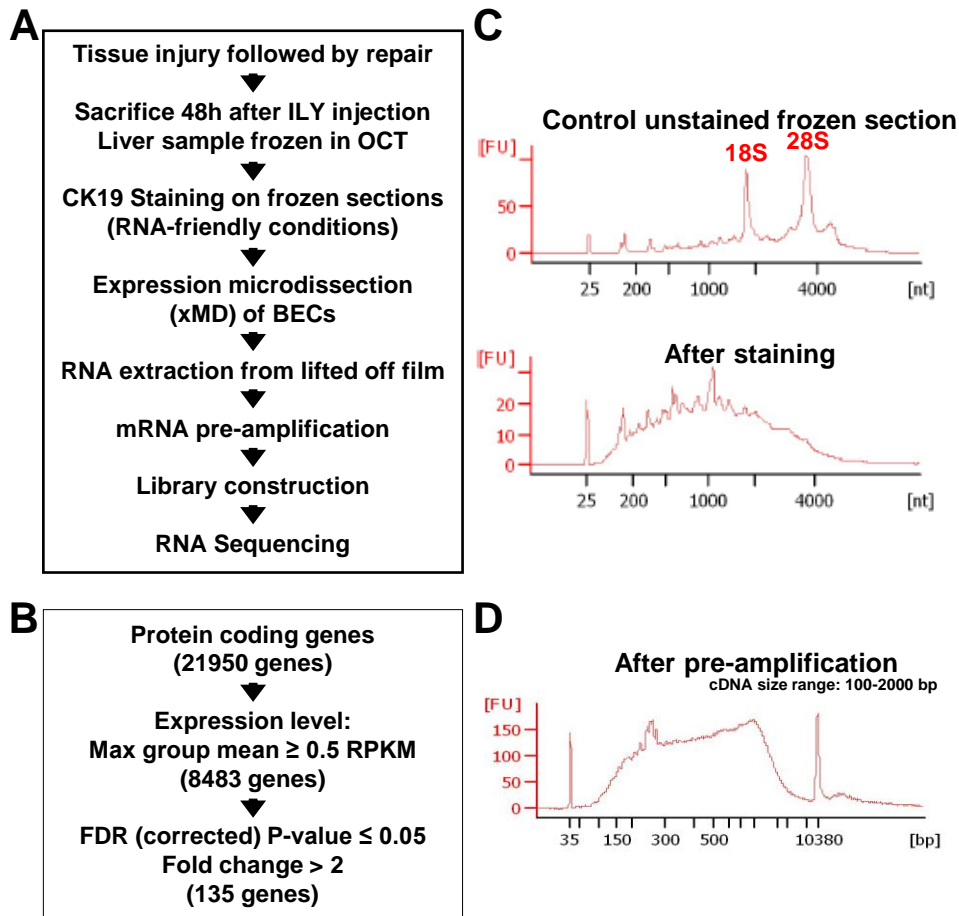

### Supplementary Figure 3: Purification and next generation transcriptome (RNAseq) analysis of regenerating BECs

**(A)** Detailed experimental design. Liver tissue from two *ihCD59* (control group) and two *ihCD59*<sup>BEC-TG</sup> (injury group) mice was collected after 48 hours of ILY injection and frozen. Messenger RNA from purified BECs was pre-amplified and sequenced. **(B)** Number of genes throughout RNAseq analysis and filtering pipeline. **(C)** Quality assessment was performed by Bioanalyzer on RNA extracted from unstained or RNA-friendly stained liver tissue sections. Representative plots are shown, revealing acceptable RNA quality after staining (average mRNA length of 1,000 nucleotides shows limited degradation). **(D)** Size profile of pre-amplified mRNA (cDNA) using Ovation RNA-seq System V2. Representative plot.

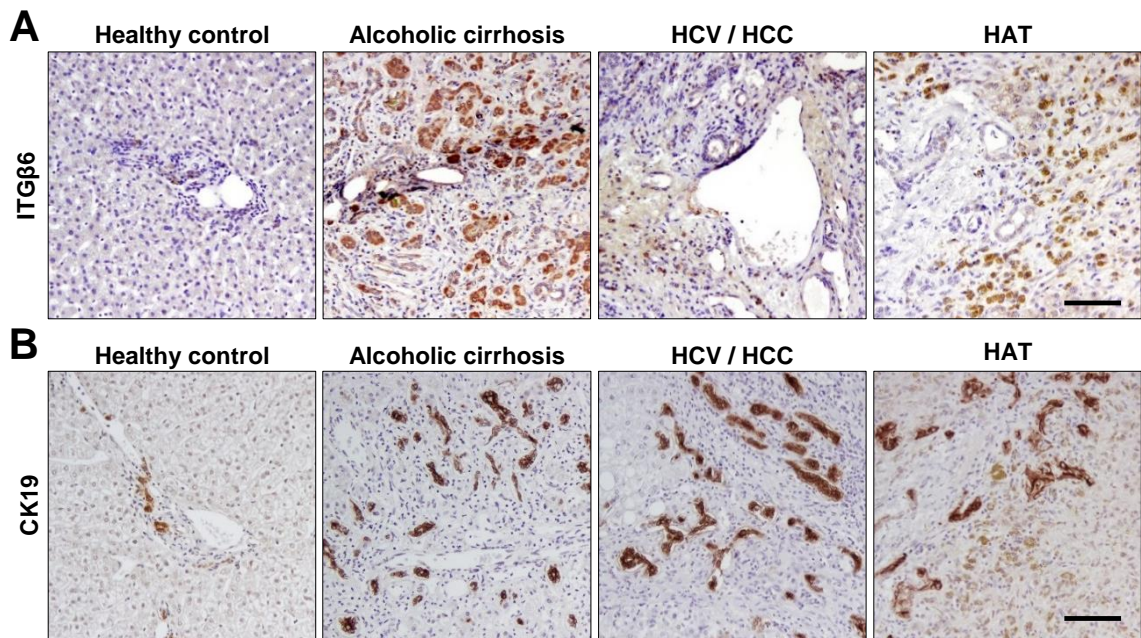

**Supplementary Figure 4: Integrin  $\alpha v \beta 6$  expression is increased in human ductular reaction**  
 Representative images of **(A)** integrin  $\alpha v \beta 6$  (ITG $\beta 6$ ) and **(B)** cytokeratin-19 (CK19) staining performed on human liver sections of patients suffering from various chronic liver diseases. HCV / HCC: hepatitis C virus infection and hepatocellular carcinoma; HAT: hepatic artery thrombosis. Scale bars: 100  $\mu$ m.

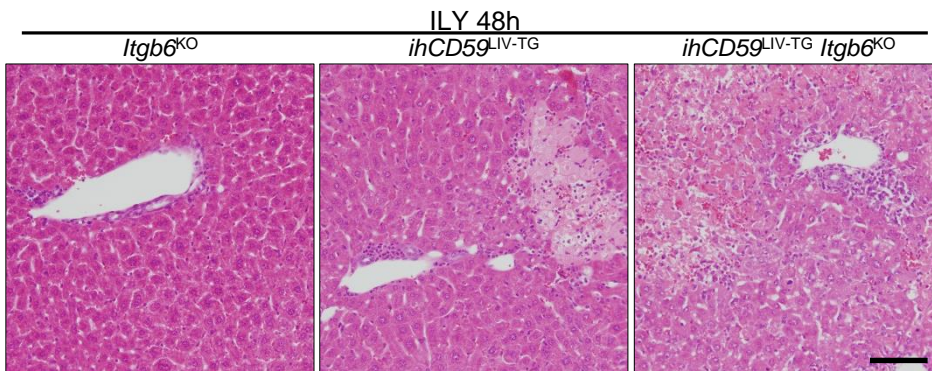

**Supplementary Figure 5: Combined acute hepatocyte and BEC death leads to mononuclear cell infiltrates and tissue necrosis.**

*ihCD59*<sup>LIV-TG</sup> and *ihCD59*<sup>LIV-TG</sup> *Itgb6*<sup>KO</sup> mice were injected intravenously with ILY, and samples were collected at the indicated time points after ILY injection. Hematoxylin-eosin staining showing tissue injury and inflammation in ILY injected mice. Scale bar: 100  $\mu$ m.

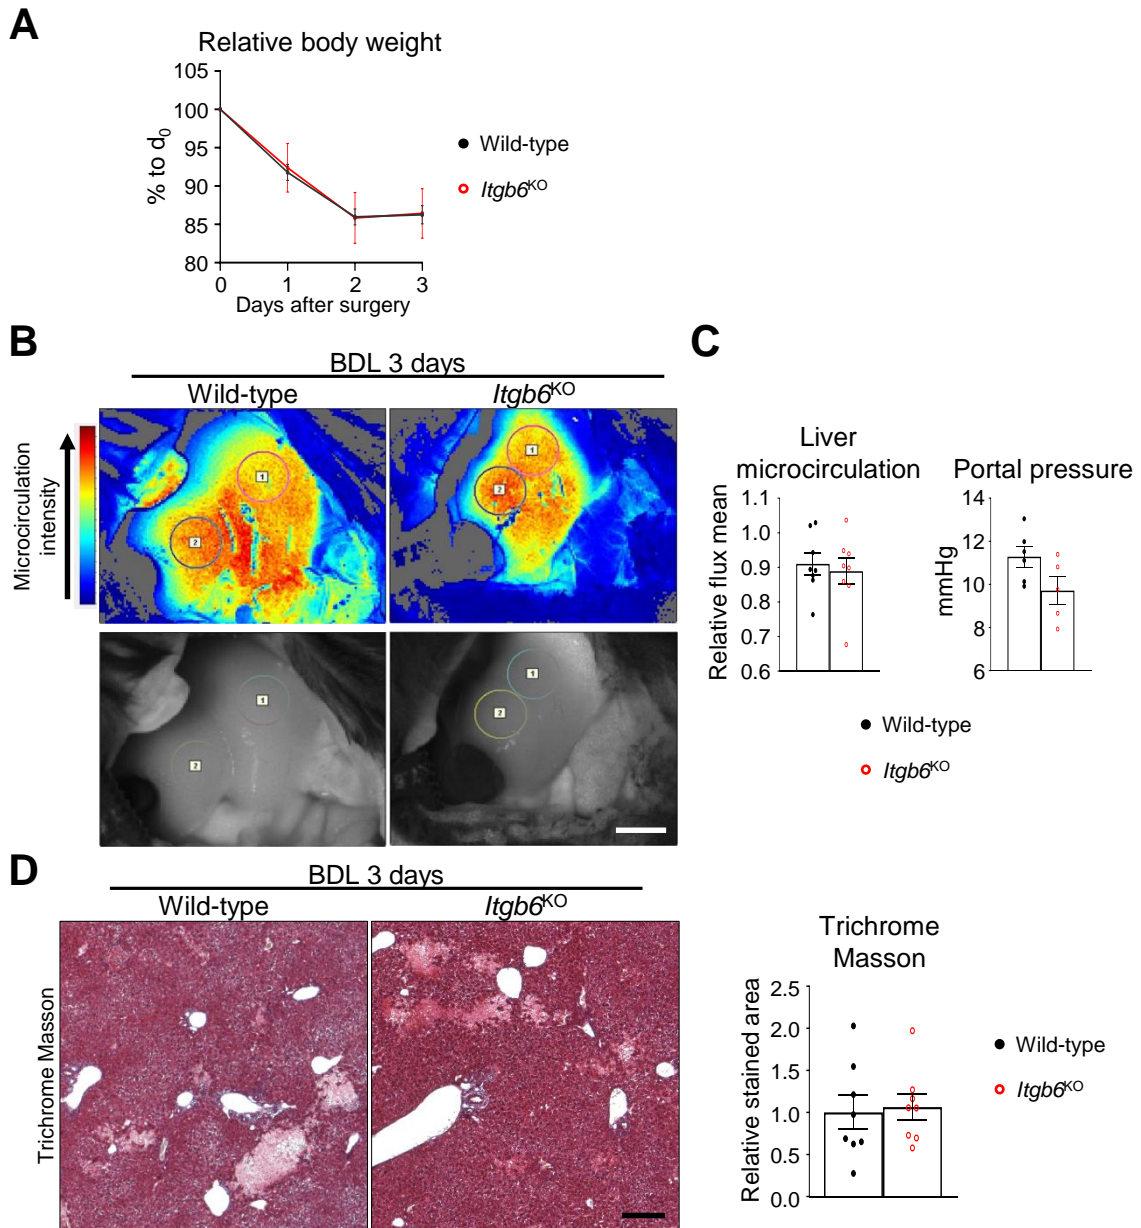

**Supplementary Figure 6: Integrin  $\alpha\beta6$  deficiency does not alter early fibrogenesis or liver microcirculation following bile duct ligation**

**(A)** Relative body weight following bile duct ligation surgery performed on wild-type and *Itgb6*<sup>KO</sup> mice (n=8 per group). **(B)** Liver microcirculation and portal pressure were measured as described in Figure 1E. Representative flux images of wild-type and *Itgb6*<sup>KO</sup> mice, three days after BDL surgery. Scale bar: 5 mm. **(C)** Relative blood flux mean and portal pressure values. Portal pressure measurement (n=6 wild-type and n=5 *Itgb6*<sup>KO</sup>). **(D)** Trichrome Masson staining was performed on liver sections, and the stained area was quantified (n=8 per group). Scale bar: 200  $\mu$ m.



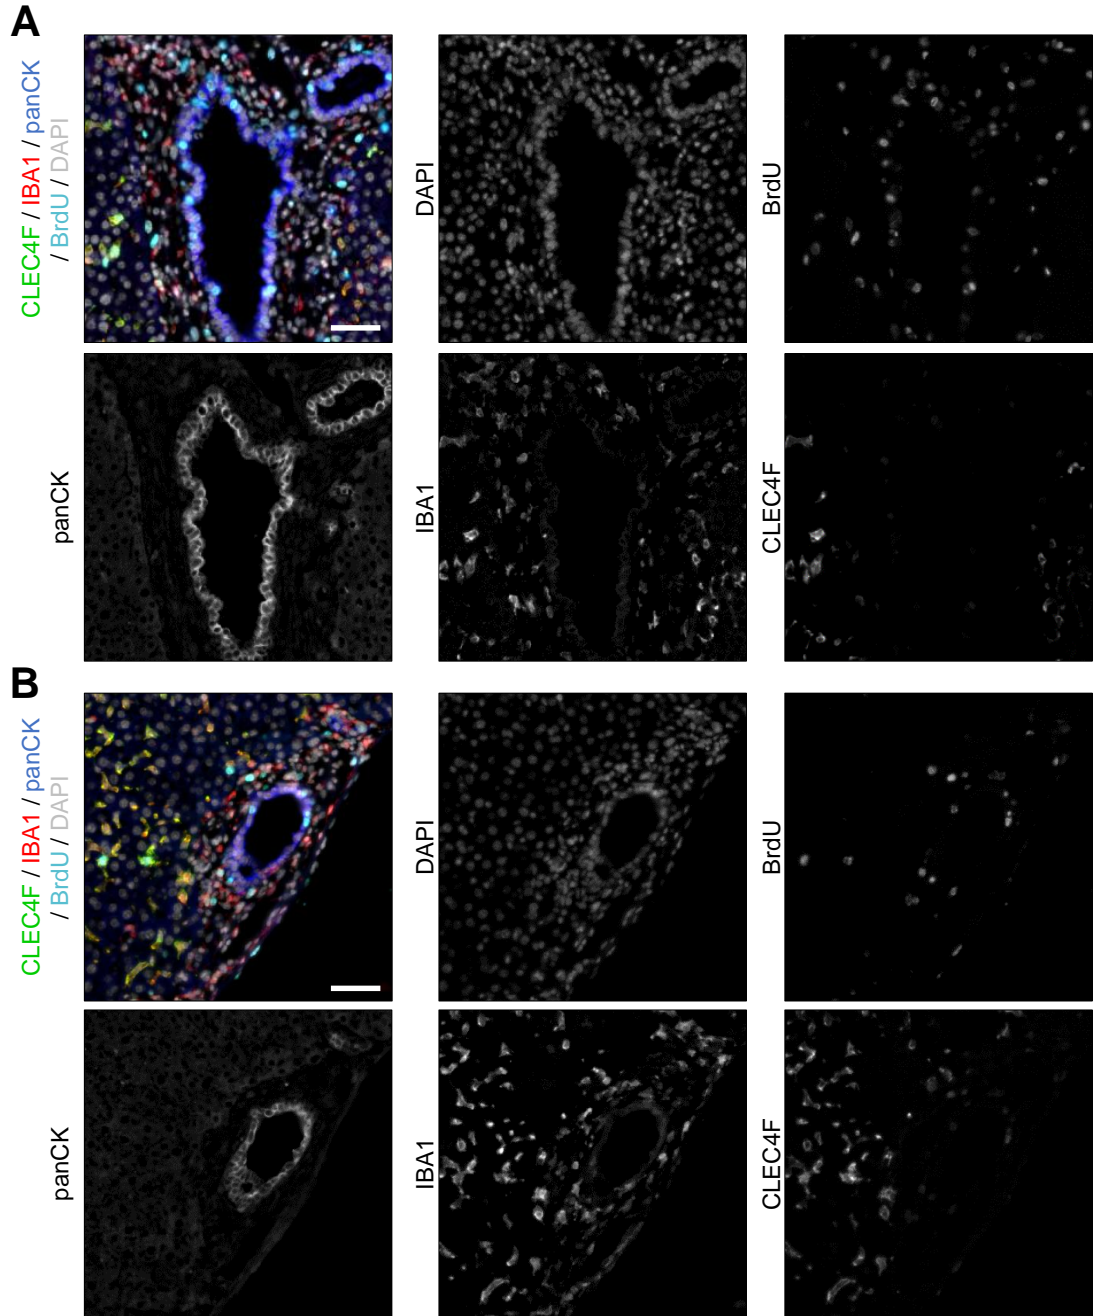

**Supplementary Figure 7: Integrin  $\alpha\beta6$  deficiency reduces BEC proliferation following bile duct ligation**

Single channel pictures from multiplex fluorescence immunostaining (Figure 5E) are depicted in grayscale, obtained from **(A)** wild-type, or **(B)** *Itgb6*<sup>KO</sup> FFPE liver, 3 days after bile duct ligation. Scale bars: 50  $\mu\text{m}$ .

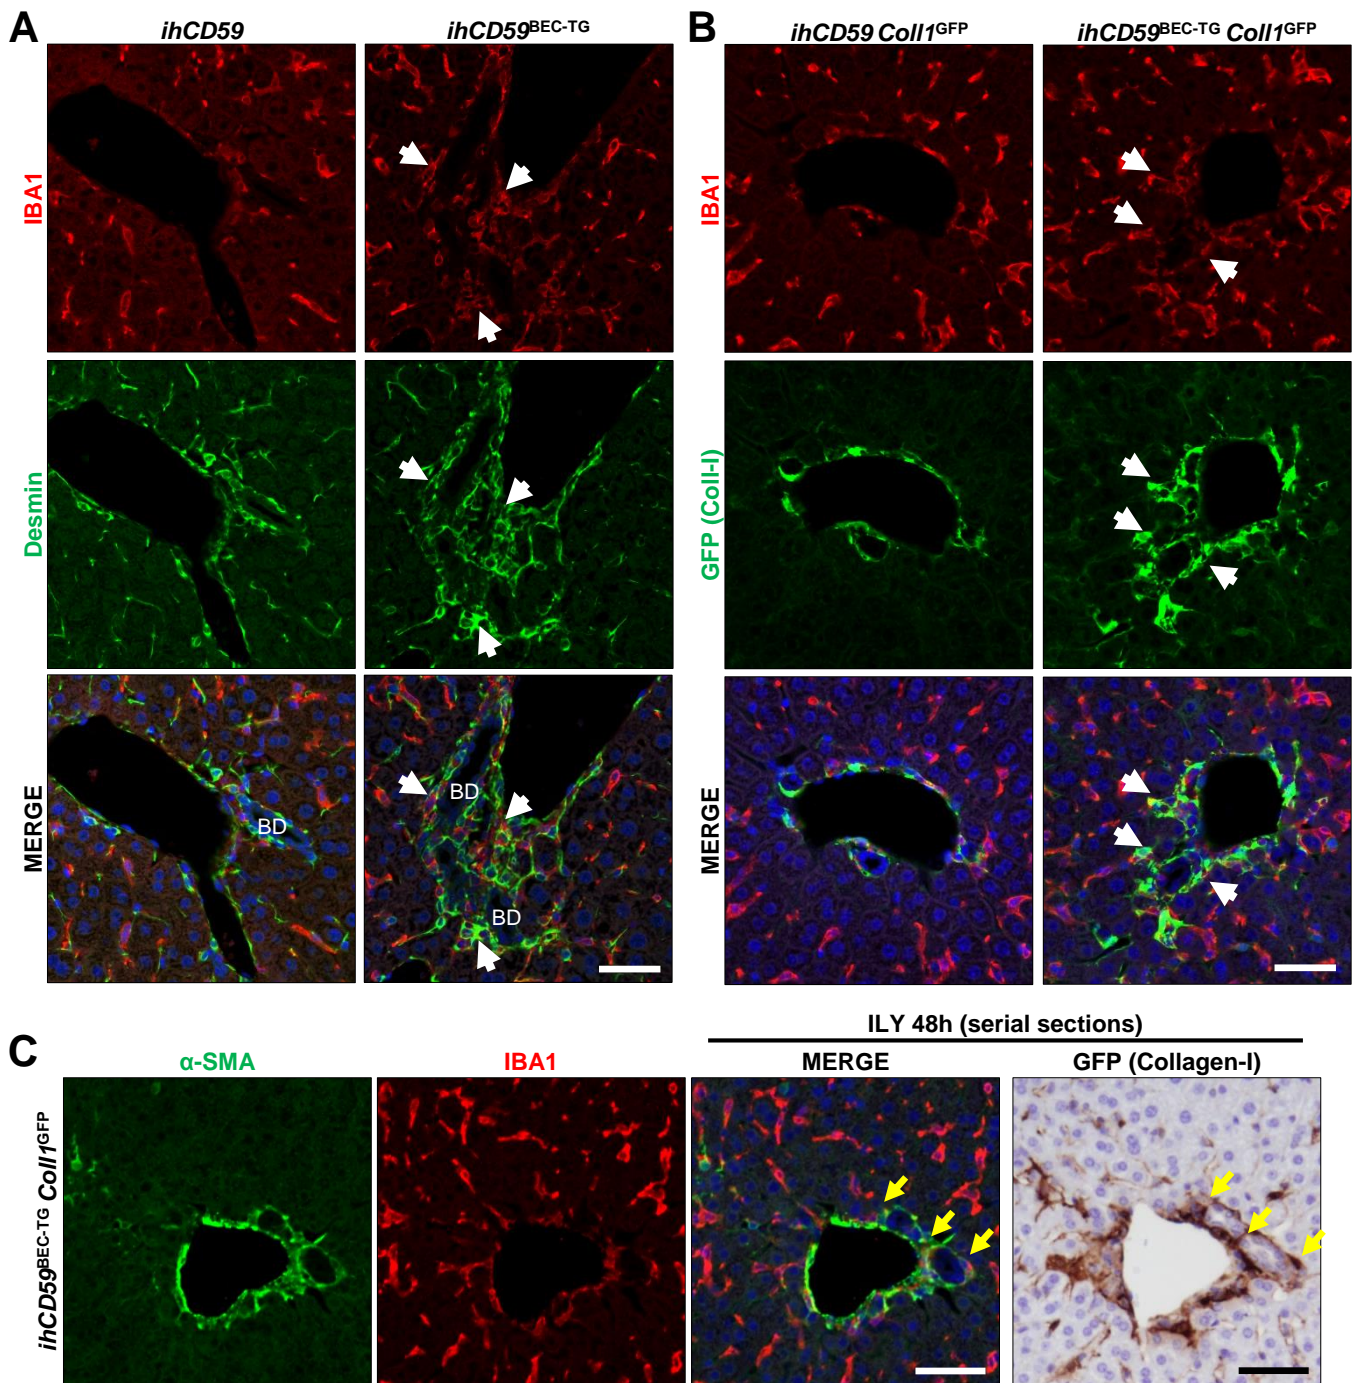

**Supplementary Figure 8: Monocytes and fibrogenic cells are in close interaction during bile duct repair.**

Single channel pictures from data presented in Figure 6A-C. **(A)** IBA1 (red) and Desmin (green), and **(B)** IBA1 (red) GFP (Collagen-I, green) immunostaining was performed, 48 hours after ILY administration. **(C)** IBA1 (red) and  $\alpha$ -SMA (green) co-staining, and GFP (collagen-I) staining were performed on serial liver sections from *ihCD59<sup>BEC-TG</sup> Coll1<sup>GFP</sup>* mice, 48h after ILY injection. Yellow arrows indicate cell clusters of IBA1<sup>+</sup>,  $\alpha$ -SMA<sup>+</sup> and GFP<sup>+</sup> cells. Scale bars: 50  $\mu$ m.

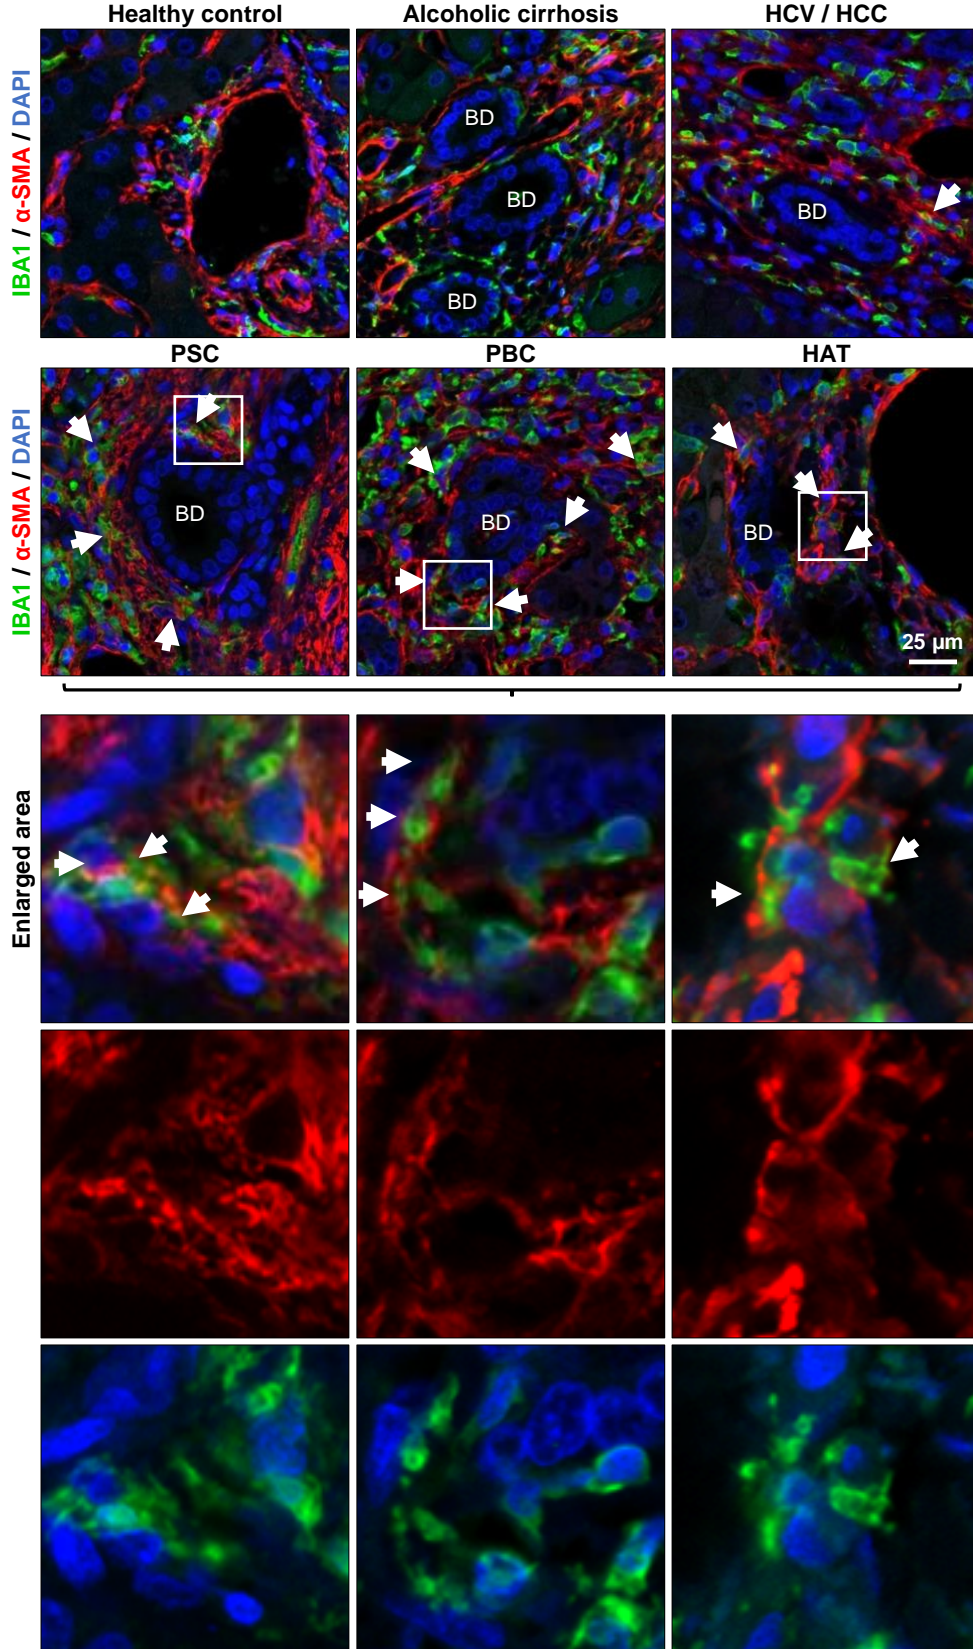

**Supplementary Figure 9: IBA1<sup>+</sup> macrophages and  $\alpha$ -SMA<sup>+</sup> fibroblasts accumulate around injured bile ducts in patients suffering liver disease of various etiologies**

Representative images of IBA1 (green) and  $\alpha$ -SMA (red) staining performed on various chronic liver diseases from patients. An enlarged area with single channel pictures is depicted in the lower panel. White arrows indicate positive cell clusters. Quantification is depicted in Figure 6D. BD: bile duct-like structures; HCV/HCC: Hepatitis C virus infection and hepatocellular carcinoma; PSC: primary sclerosing cholangitis; PBC: primary biliary cholangitis; HAT: hepatic artery thrombosis.

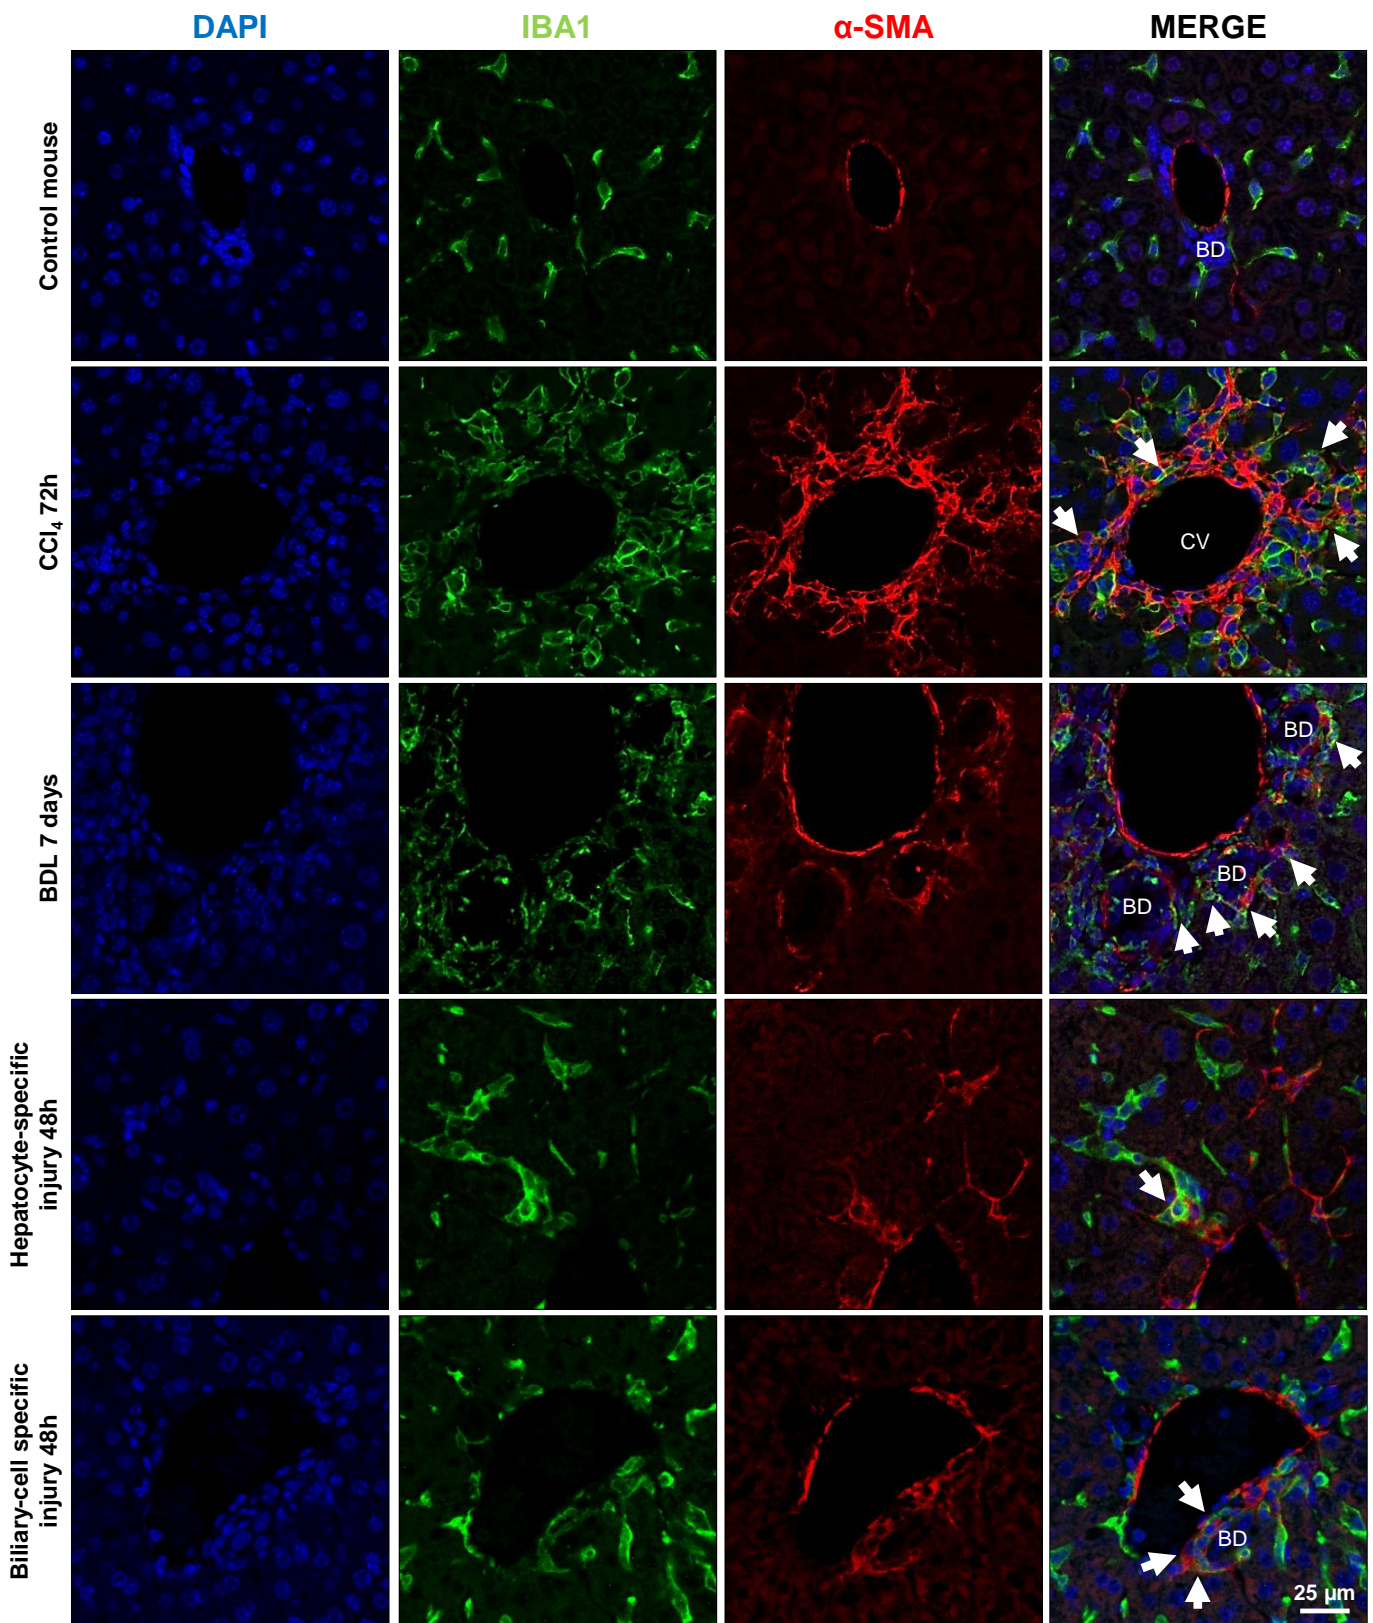

**Supplementary Figure 10: IBA1<sup>+</sup> macrophages and  $\alpha$ -SMA<sup>+</sup> fibroblasts accumulate around injured bile ducts in different murine models of liver injury**

Representative images of the IBA1 (green) and  $\alpha$ -SMA (red) staining performed on mouse samples from different liver injury models. Quantification is depicted in Figure 6D. White arrows indicate double positive cells. CV: central vein, BD: bile duct-like structures, BDL: Bile duct ligation and section.

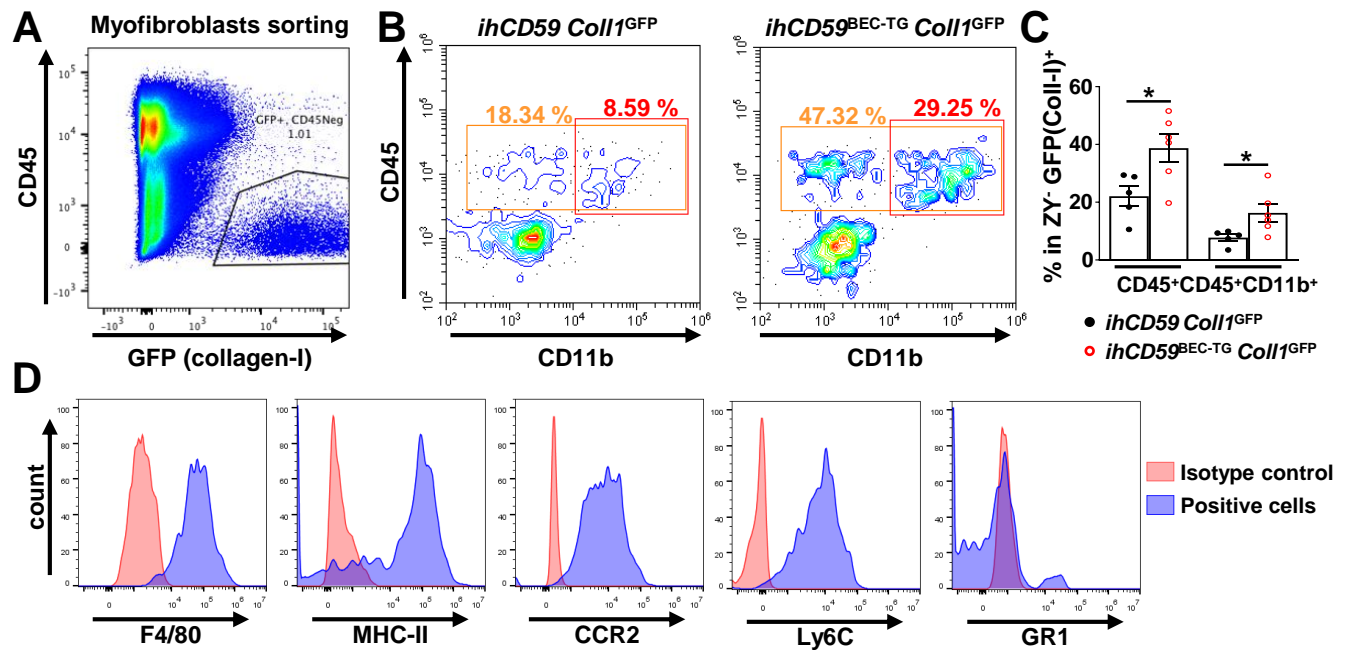

### Supplementary Figure 11: Monocytes, an alternative source of fibrogenic cells?

**(A)** Collagen-I producing (GFP<sup>+</sup>) CD45<sup>NEG</sup> fibroblasts were sorted from carbon tetrachloride (CCl<sub>4</sub>) injected *Coll1<sup>GFP</sup>* mouse livers. **(B)** *ihCD59<sup>BEC-TG</sup> Coll1<sup>GFP</sup>* mice were injected with ILY, and euthanized 48 hours after ILY injection. Representative flow cytometry data obtained from liver non-parenchymal cell fraction analysis are shown. After doublets exclusion and SSC/FSC gating, live (Zombie Yellow negative) and GFP (collagen-I) -positive cells were assessed for CD45 and CD11b expression. **(C)** Flow cytometry results from 5-6 mice per group show percentages of ZY-GFP<sup>+</sup>CD45<sup>+</sup> and ZY-GFP<sup>+</sup>CD45<sup>+</sup>CD11b<sup>+</sup> among ZY-GFP<sup>+</sup> cells. **(D)** Representative F4/80, MHC-II, CCR2, Ly6C and GR1 expression in ZY-GFP<sup>+</sup>CD45<sup>+</sup>CD11b<sup>+</sup> cells from *ihCD59<sup>BEC-TG</sup> Coll1<sup>GFP</sup>* mice as assessed by FACS, 48 hours after ILY injection. \**p*<0.05 as compared to control *ihCD59Coll1<sup>GFP</sup>* mice, unpaired Student's t test (n=5-6 per group).

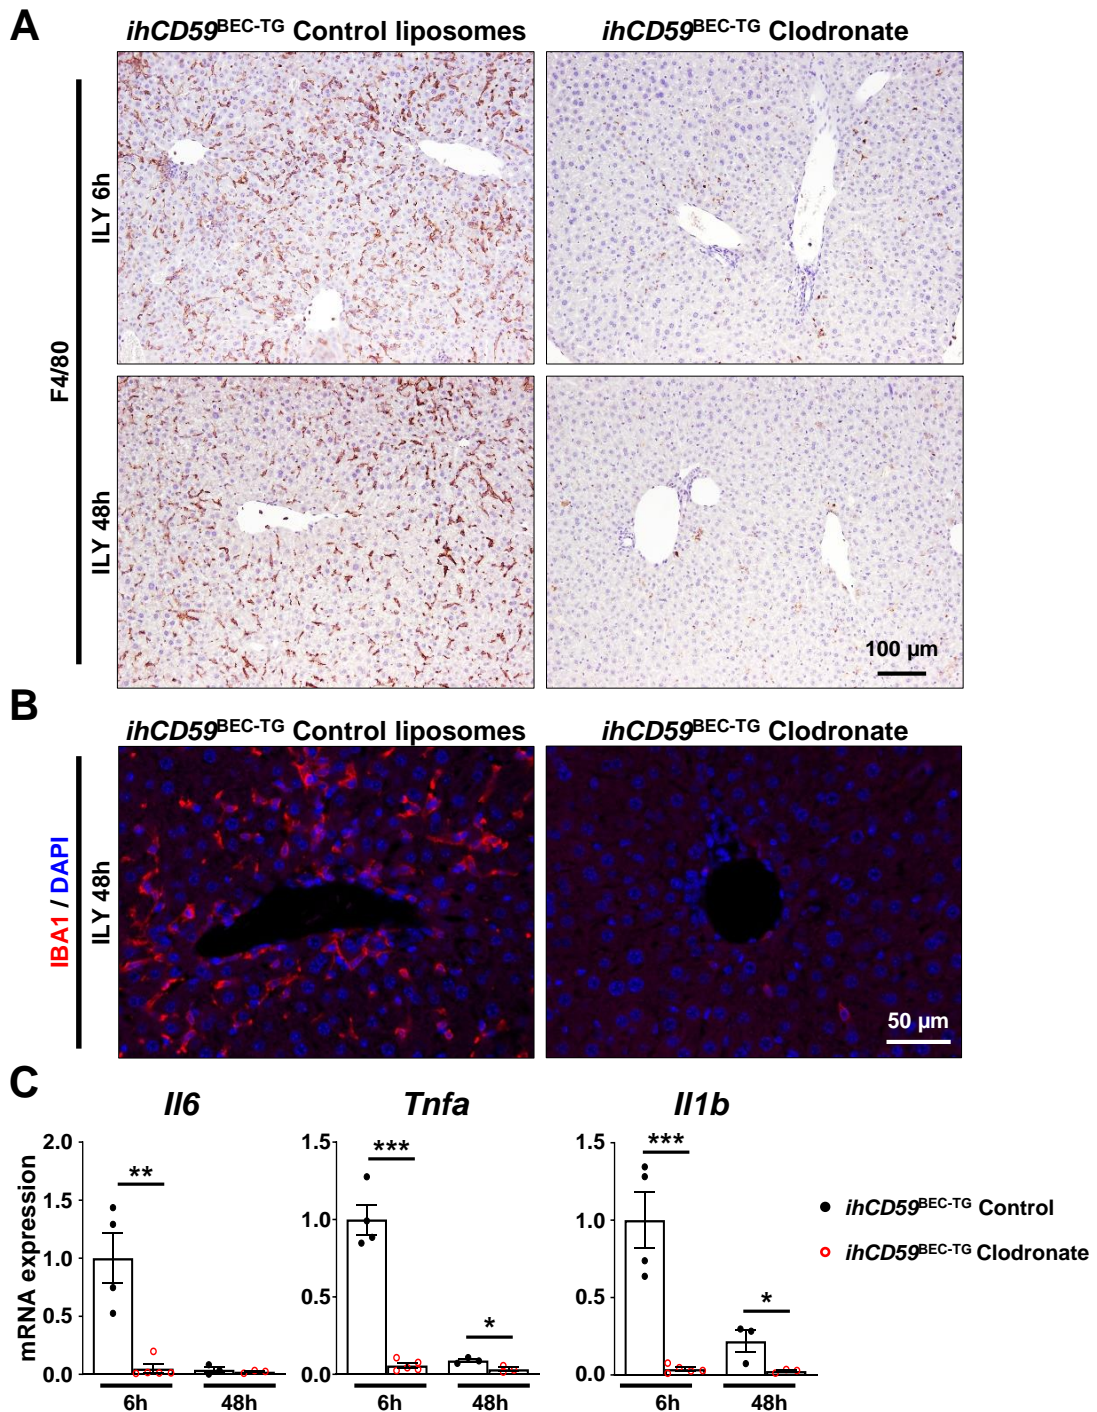

### Supplementary Figure 12: Liver inflammation is impaired after macrophage depletion using clodronate-loaded liposomes

Following tamoxifen injections and wash out period, macrophages were depleted using clodronate-loaded liposomes 24 hours prior to ILY injection. Macrophage depletion was verified by (A) F4/80 immunostaining, and (B) IBA1 immunostaining. (C) Inflammation-related relative gene expression was assessed on liver homogenates by qRT-PCR. Data are represented as mean  $\pm$  SEM. \* $p < 0.05$ ; \*\* $p < 0.01$ ; \*\*\* $p < 0.005$  as compared to control liposome injected mice, unpaired Student's t test ( $n = 3-5$  per group).

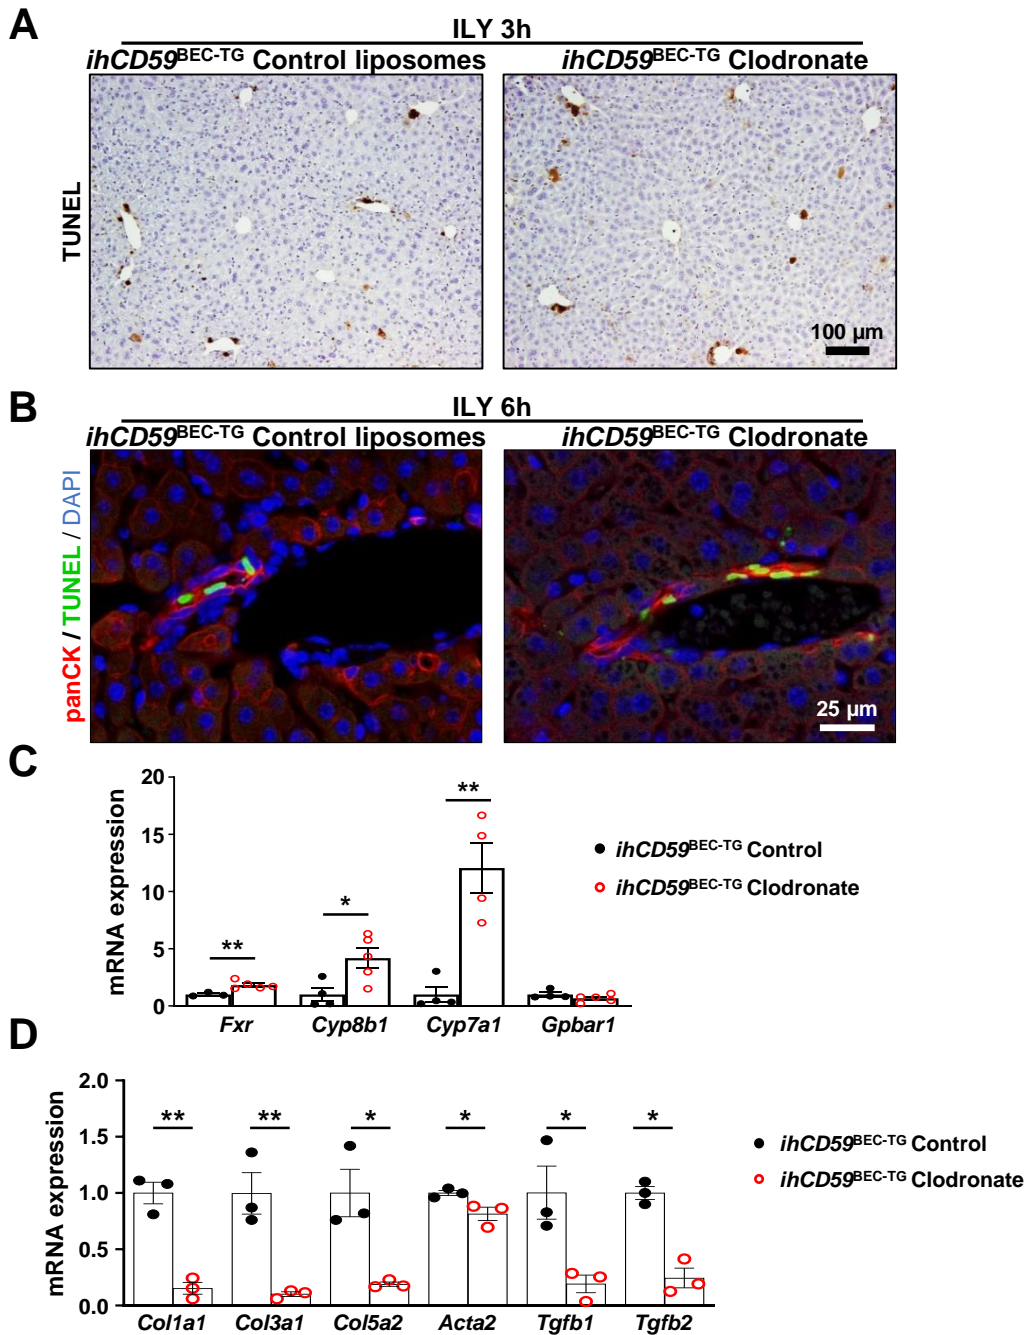

**Supplementary Figure 13: Macrophage depletion reduces cholestasis and bile duct repair after BEC injury (representative fields)**

(A) TUNEL, and (B) panCK (red) TUNEL (green) representative images used for the quantifications presented in Figure 7A. (C) Quantitative RT-PCR data depicted in Figure 7C. (D) Quantitative RT-PCR data depicted in Figure 7E. Data are represented as mean  $\pm$  SEM. \* $p < 0.05$ ; \*\* $p < 0.01$  as compared to control liposome injected *ihCD59<sup>BEC-TG</sup>* mice, unpaired Student's t test ( $n = 3-5$  per group).

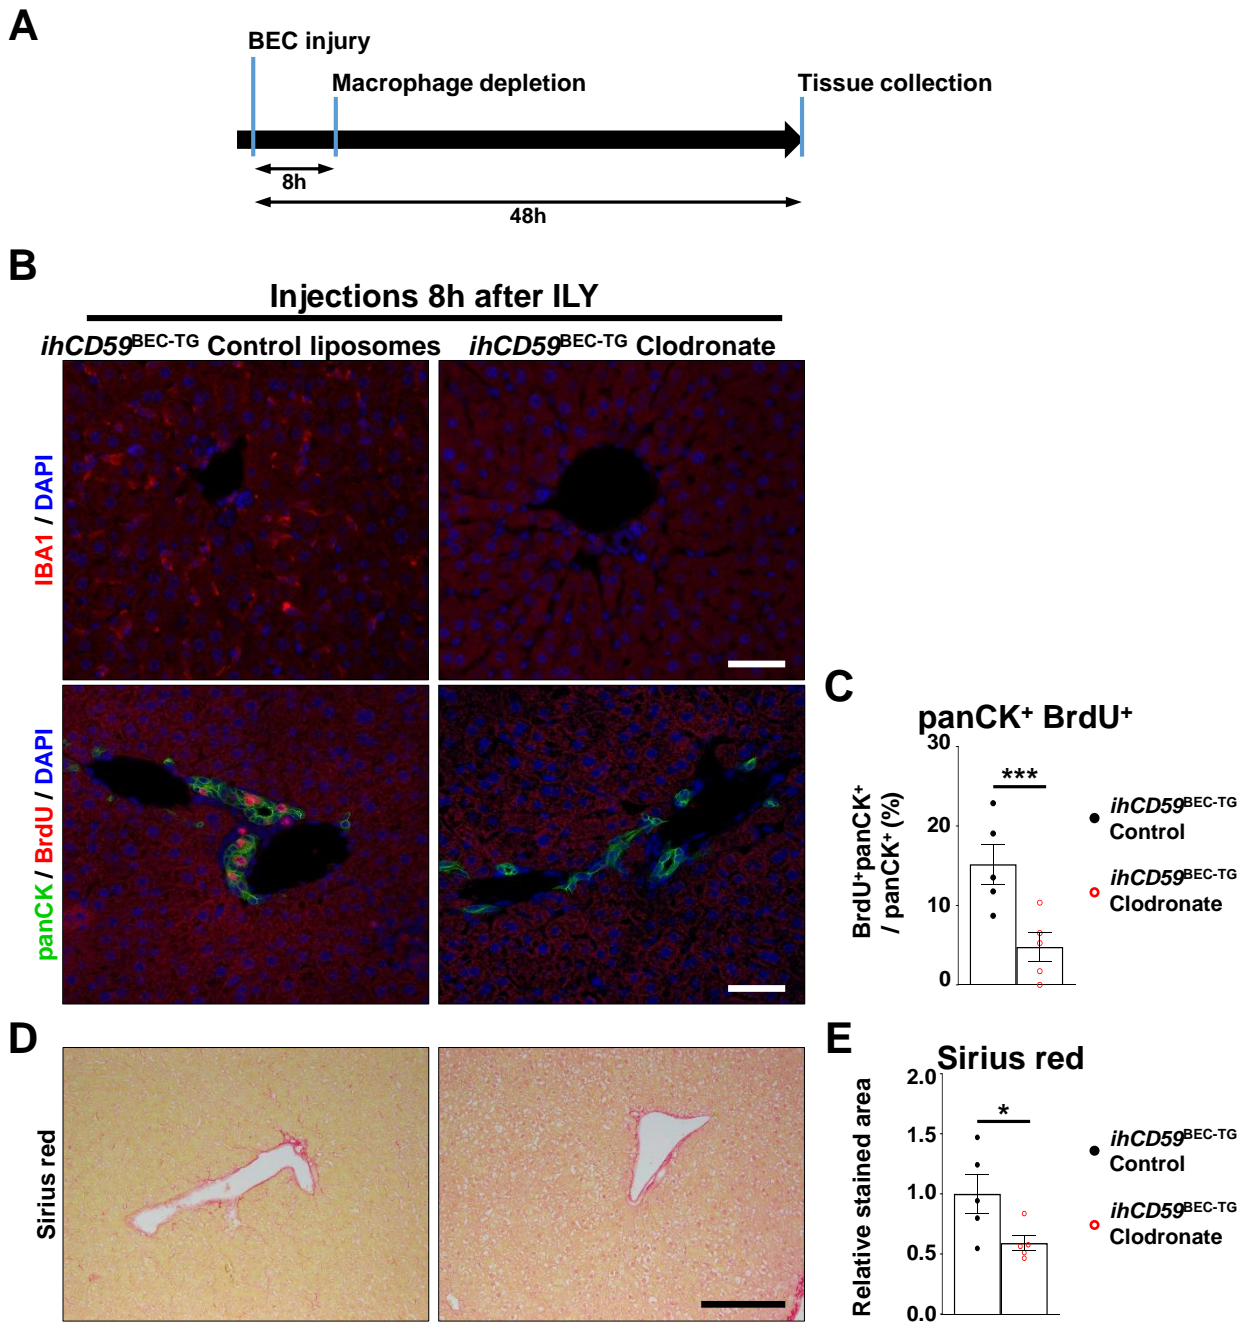

**Supplementary Figure 14: Macrophage depletion 8 hours after ILY injection reduces BEC proliferation**

(A) Experimental design: Mice were injected with clodronate-loaded or control liposomes 8 hours after ILY injection. Tissues were collected 48 hours after the initial BEC injury. (B) IBA1 (red, upper panel), panCK and BrdU (green and red, respectively, lower panel) were performed on liver sections obtained from control- or clodronate-loaded liposome injected mice. Scale bars: 50  $\mu$ m. (C) Quantification of proliferating BECs. (D) Sirius red staining was performed (scale bar: 200  $\mu$ m), and (E) relative stained area was quantified in both groups. \*\* $p < 0.01$ ; \*\*\* $p < 0.005$  as compared to control liposome injected *ihCD59<sup>BEC-TG</sup>* mice, unpaired Student's t test ( $n = 5$  per group).



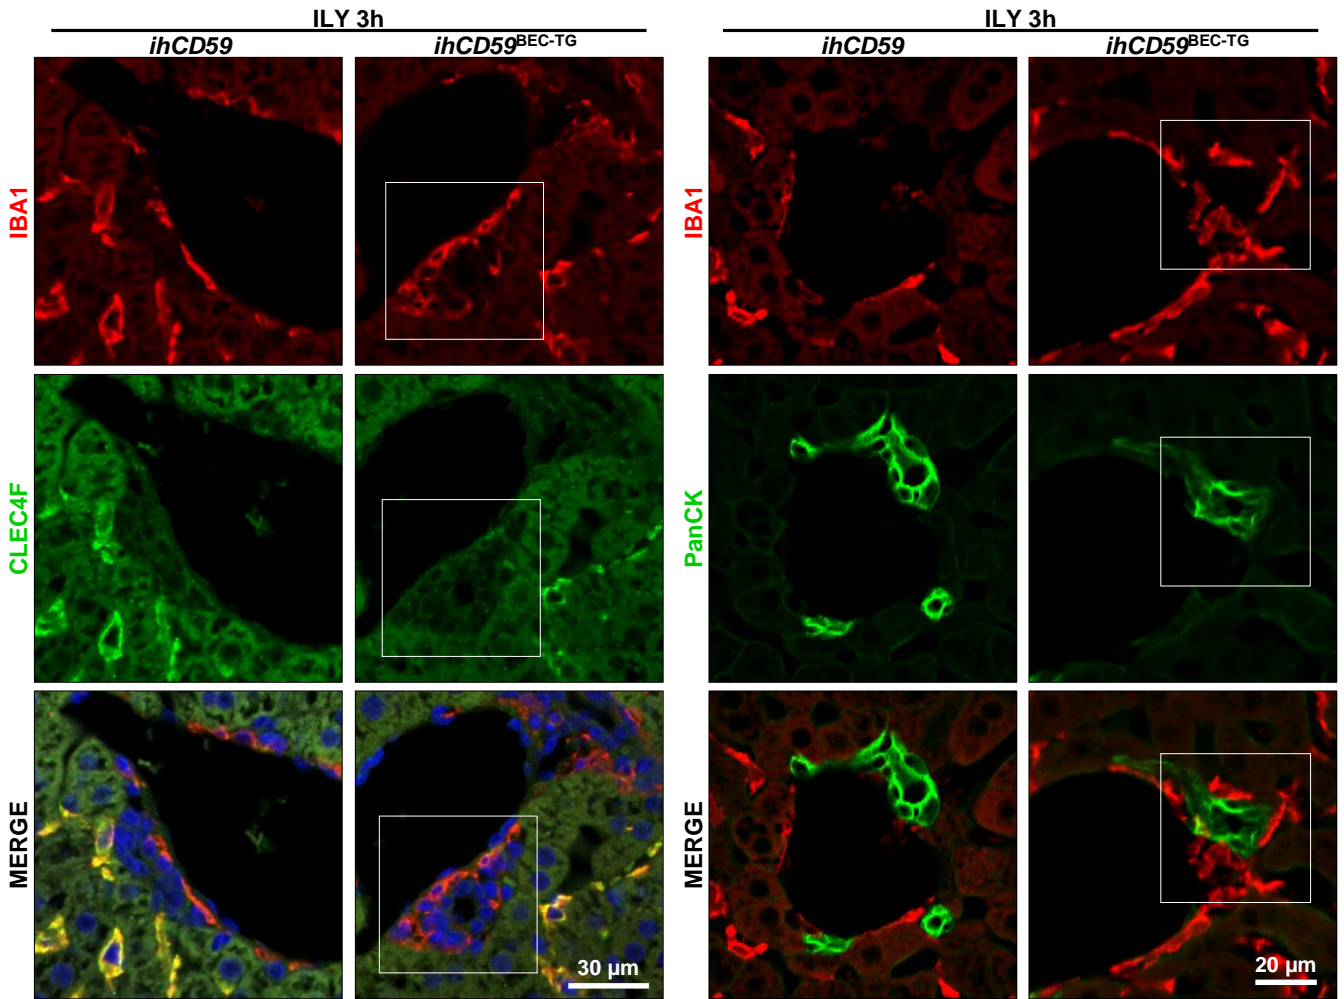

**Supplementary Figure 15: Monocytes are recruited around damaged bile ducts following acute BEC injury**

IBA1 (red) and CLEC4F (green, left panel) or pan-cytokeratin (PanCK, right panel in green) immunostaining was performed on liver sections, 3 hours after ILY injection. Single channel images of the representative fields presented in Figure 8A.

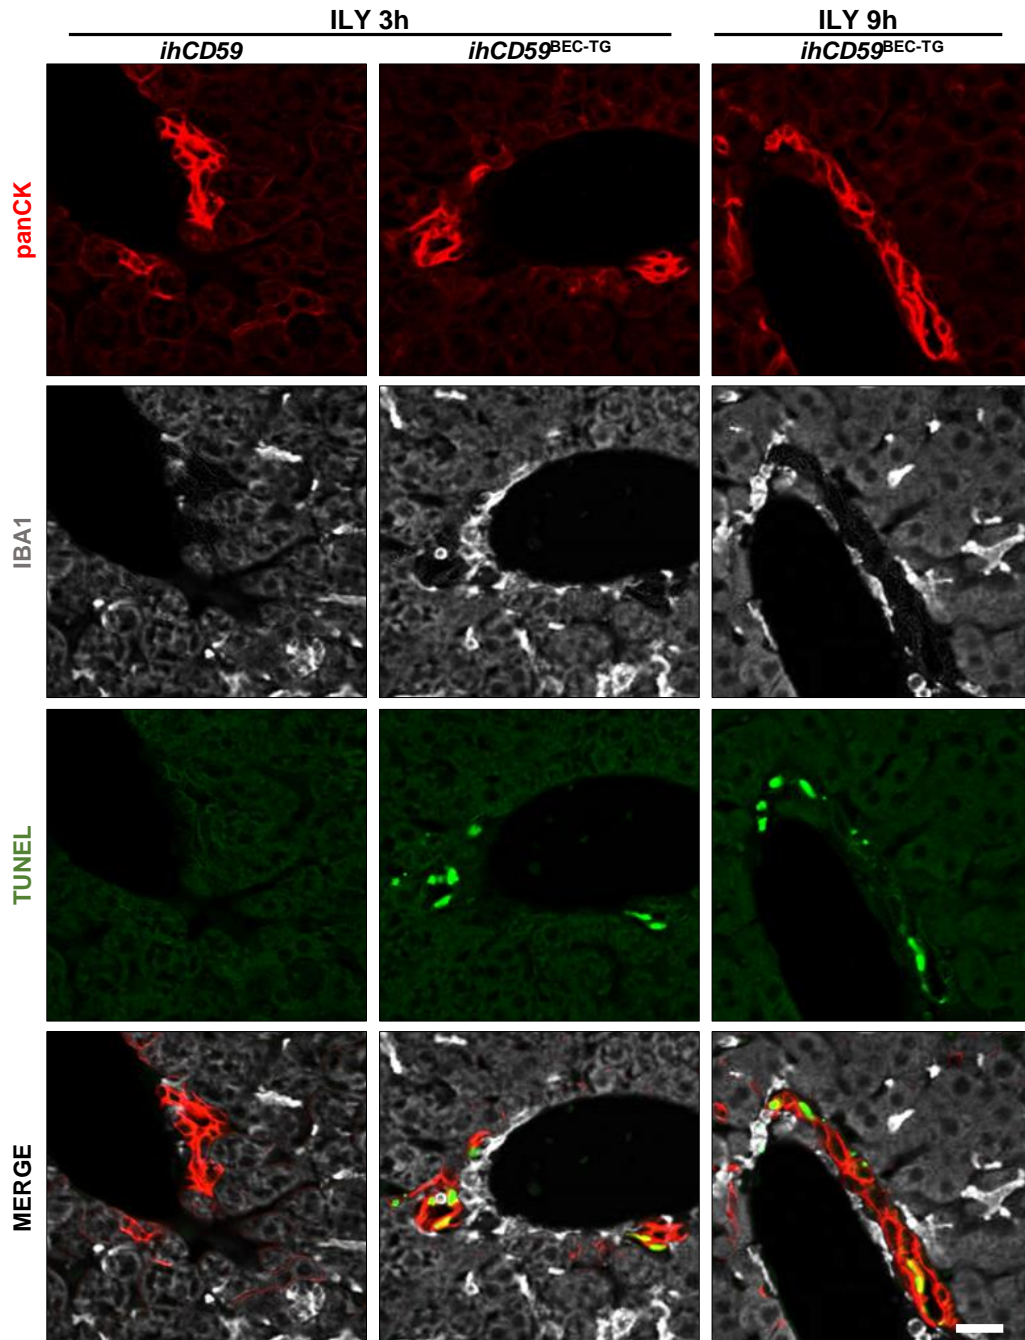

**Supplementary Figure 16: Recruited monocytes accumulate around injured BECs**

*ihCD59<sup>BEC-TG</sup>* mice were treated as described in Supplementary Figure 1. Liver tissue sections (Formalin-Fixed Paraffin-Embedded) were subjected to immunostaining. Representative immunostaining showing monocyte (IBA1, grey) accumulation in contact with damaged BECs (panCK, red and TUNEL, green). Scale bar: 20  $\mu$ m.

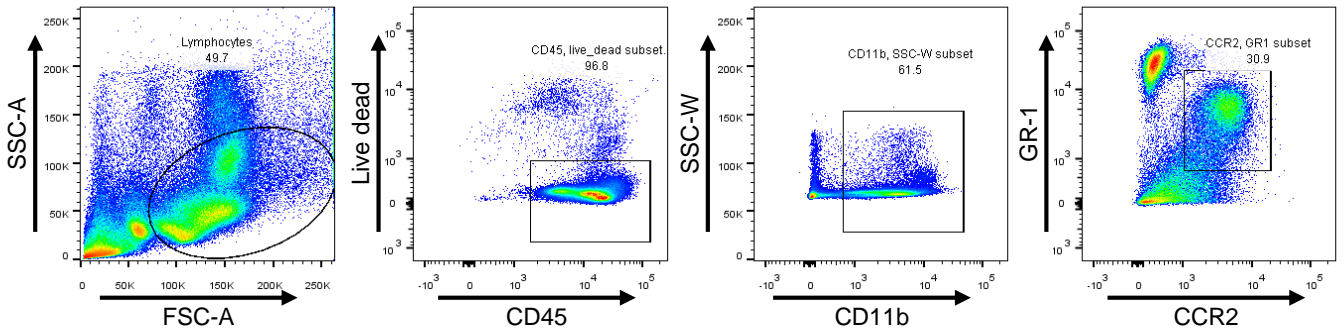

### Monocyte recruitment

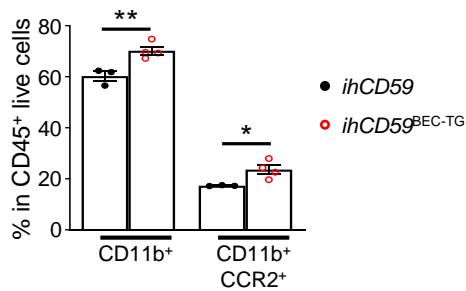

## Supplementary Figure 17: Circulating monocytes are recruited in the liver after acute biliary epithelial cell injury

Non-parenchymal cells were isolated and hepatocytes, CD3<sup>+</sup> and CD19<sup>+</sup> cells were removed. CCR2<sup>+</sup> CD11b<sup>+</sup> cells in the CD45<sup>+</sup> cell population was evaluated by flow cytometry. \**p*<0.05; \*\**p*<0.01 as indicated, unpaired Student's t test (n=3-4 per group).

**A**

ILY 6h

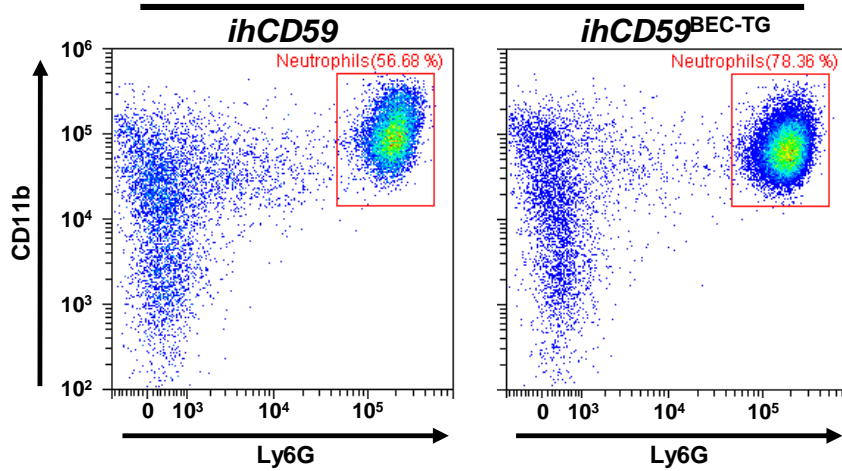**B**

ILY 6h

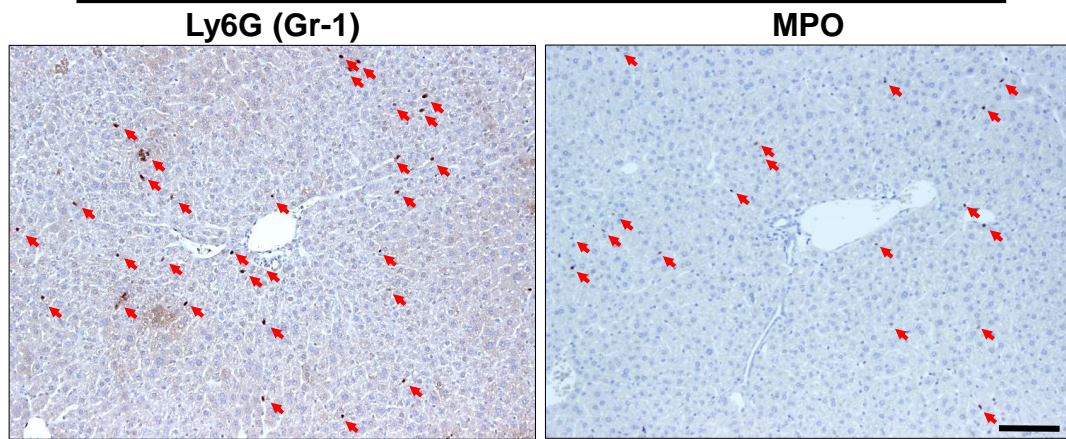**C**

ILY 6h

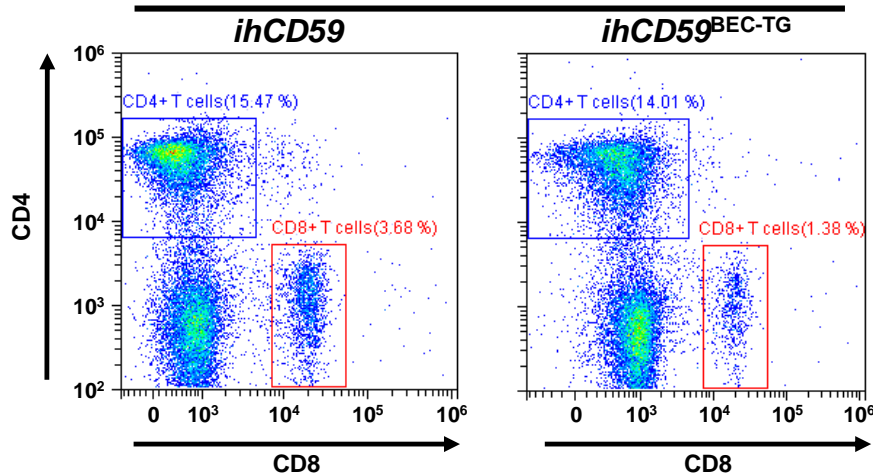

**Supplementary Figure 18: Neutrophils accumulate in the liver after BEC injury, but not in the vicinity of bile ducts while T lymphocytes do not seem to be involved**

**(A)** Non-parenchymal liver cells were isolated and analyzed by FACS staining, 6 hours after ILY injection. Neutrophils were identified as Zombie Yellow<sup>-</sup> CD45<sup>+</sup> CD3<sup>-</sup> CD19<sup>-</sup> CD11b<sup>+</sup> Ly6G<sup>+</sup> cells. **(B)** Paraffin embedded liver sections from *ihCD59<sup>BEC-TG</sup>* mice were stained for Ly6G (left panel) or myeloperoxidase (MPO, right panel) to reveal neutrophil localization. Scale bar: 100  $\mu$ m. **(C)** Leukocytes were gated as Zombie Yellow<sup>-</sup> CD45<sup>+</sup> CD3<sup>+</sup>, and CD4<sup>+</sup> or CD8<sup>+</sup> T-lymphocyte recruitment was evaluated.

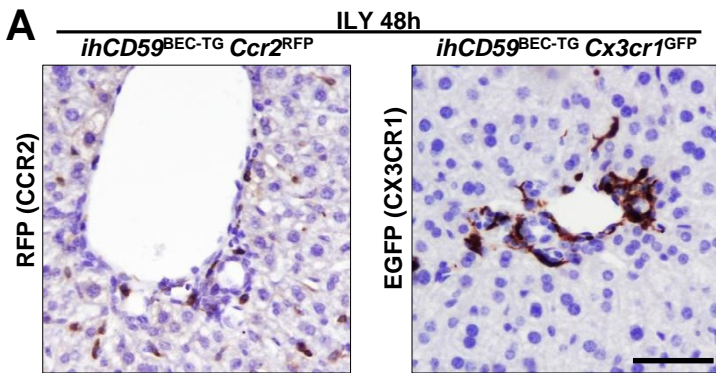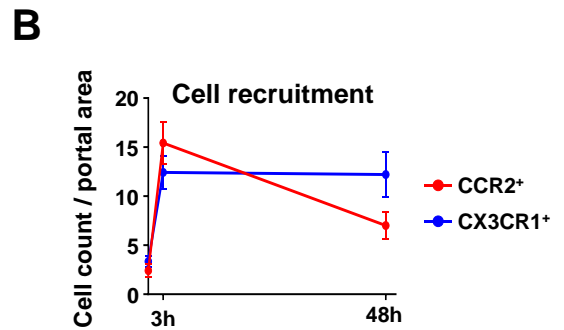

**Supplementary Figure 19: Freshly recruited monocytes accumulate around injured BECs 48 hours post-injury**

*ihCD59 Cx3cr1<sup>GFP</sup>*, *ihCD59<sup>BEC-TG</sup> Cx3cr1<sup>GFP</sup>*, *ihCD59 Ccr2<sup>RFP</sup>* and *ihCD59<sup>BEC-TG</sup> Ccr2<sup>RFP</sup>* mice were treated as described in Supplementary Figure 1. Liver tissues were subjected to immunostaining. **(A)** GFP or RFP immunostaining, as appropriate. **(D)** GFP<sup>+</sup> or RFP<sup>+</sup> cell count, showing CCR2<sup>+</sup> or CX3CR1<sup>+</sup> cell accumulation in portal areas (n=5-7 per group). Scale bar: 50  $\mu$ m.

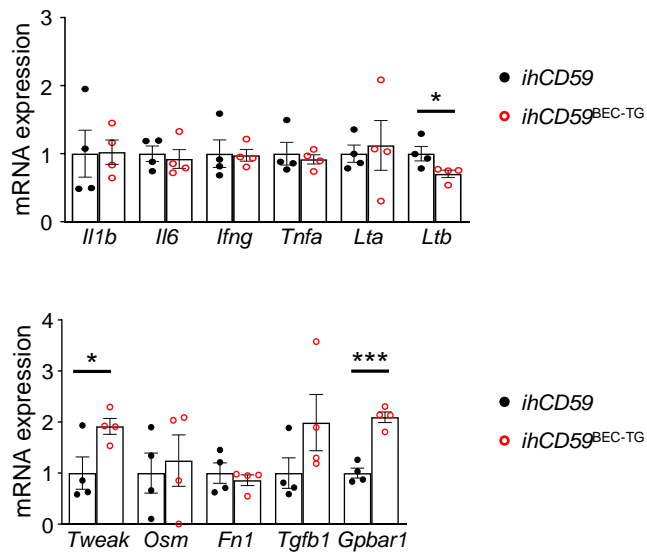

### Supplementary Figure 20: Macrophage characterization during bile duct repair

Liver macrophages were isolated from *ihCD59* and *ihCD59<sup>BEC-TG</sup>* mice, 48 hours after ILY injection. Gene expression analysis was performed by qRT-PCR. Statistical analysis of qRT-PCR data shown in Figure 6J. \* $p < 0.05$ ; \*\*\* $p < 0.005$  as indicated, unpaired Student's t test (n=4 per group).

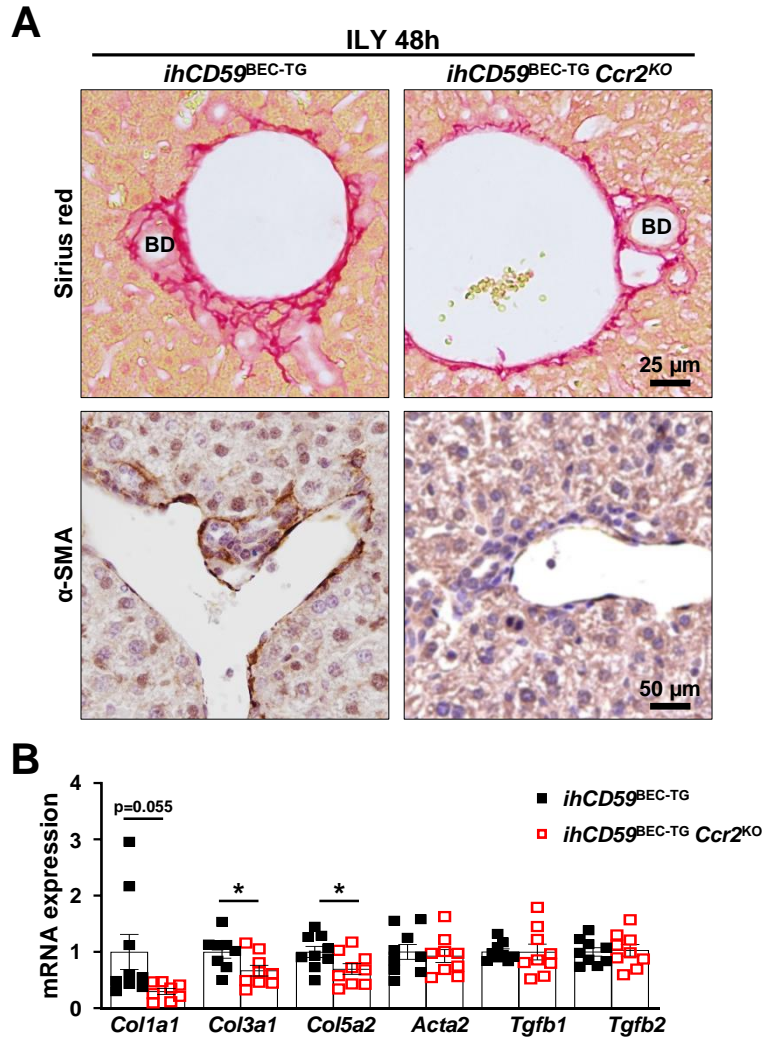

**Supplementary Figure 21: Macrophage depletion or Ccr2-deficiency reduces portal fibrosis in a model of acute and targeted biliary epithelial cell death**

*ihCD59<sup>BEC-TG</sup>* and *ihCD59<sup>BEC-TG</sup> Ccr2<sup>KO</sup>* mice were also injected with ILY and liver tissue was collected after 48 hours. **(A)** Representative pictures obtained after Sirius red, α-SMA or PanCK (green) and BrdU (red) staining used for quantification in Figure 8F. **(B)** Statistical analysis of qRT-PCR data shown in Figure 8G, \* $p < 0.05$ ; \*\* $p < 0.01$  as indicated, unpaired Student's t test (n=8-9 per group).

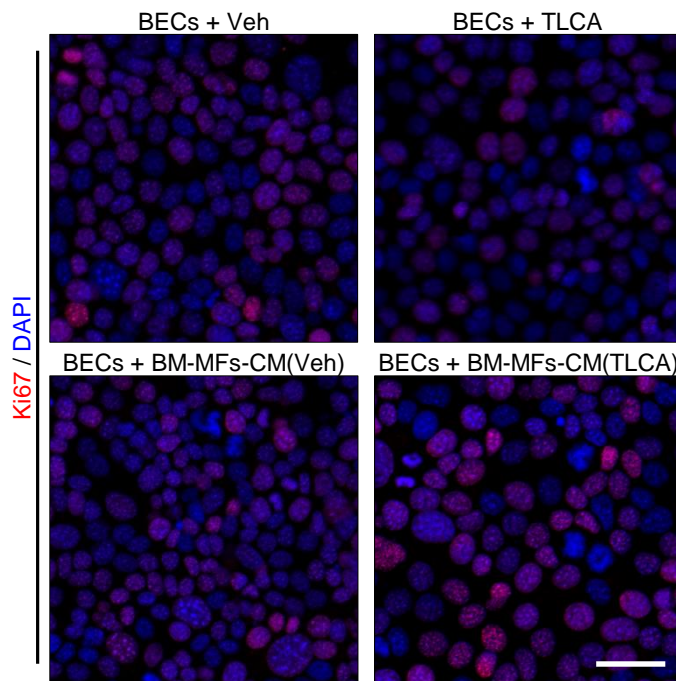

**Supplementary Figure 22: Cultured BECs proliferation is increased in the presence of bile acid-activated macrophages.**

Conditioned-media from TLCA-treated bone-marrow derived macrophages (BM-MFs-CM) was added to BECs for 24 hours, and Ki67 staining was performed. Scale bar: 40  $\mu$ m.



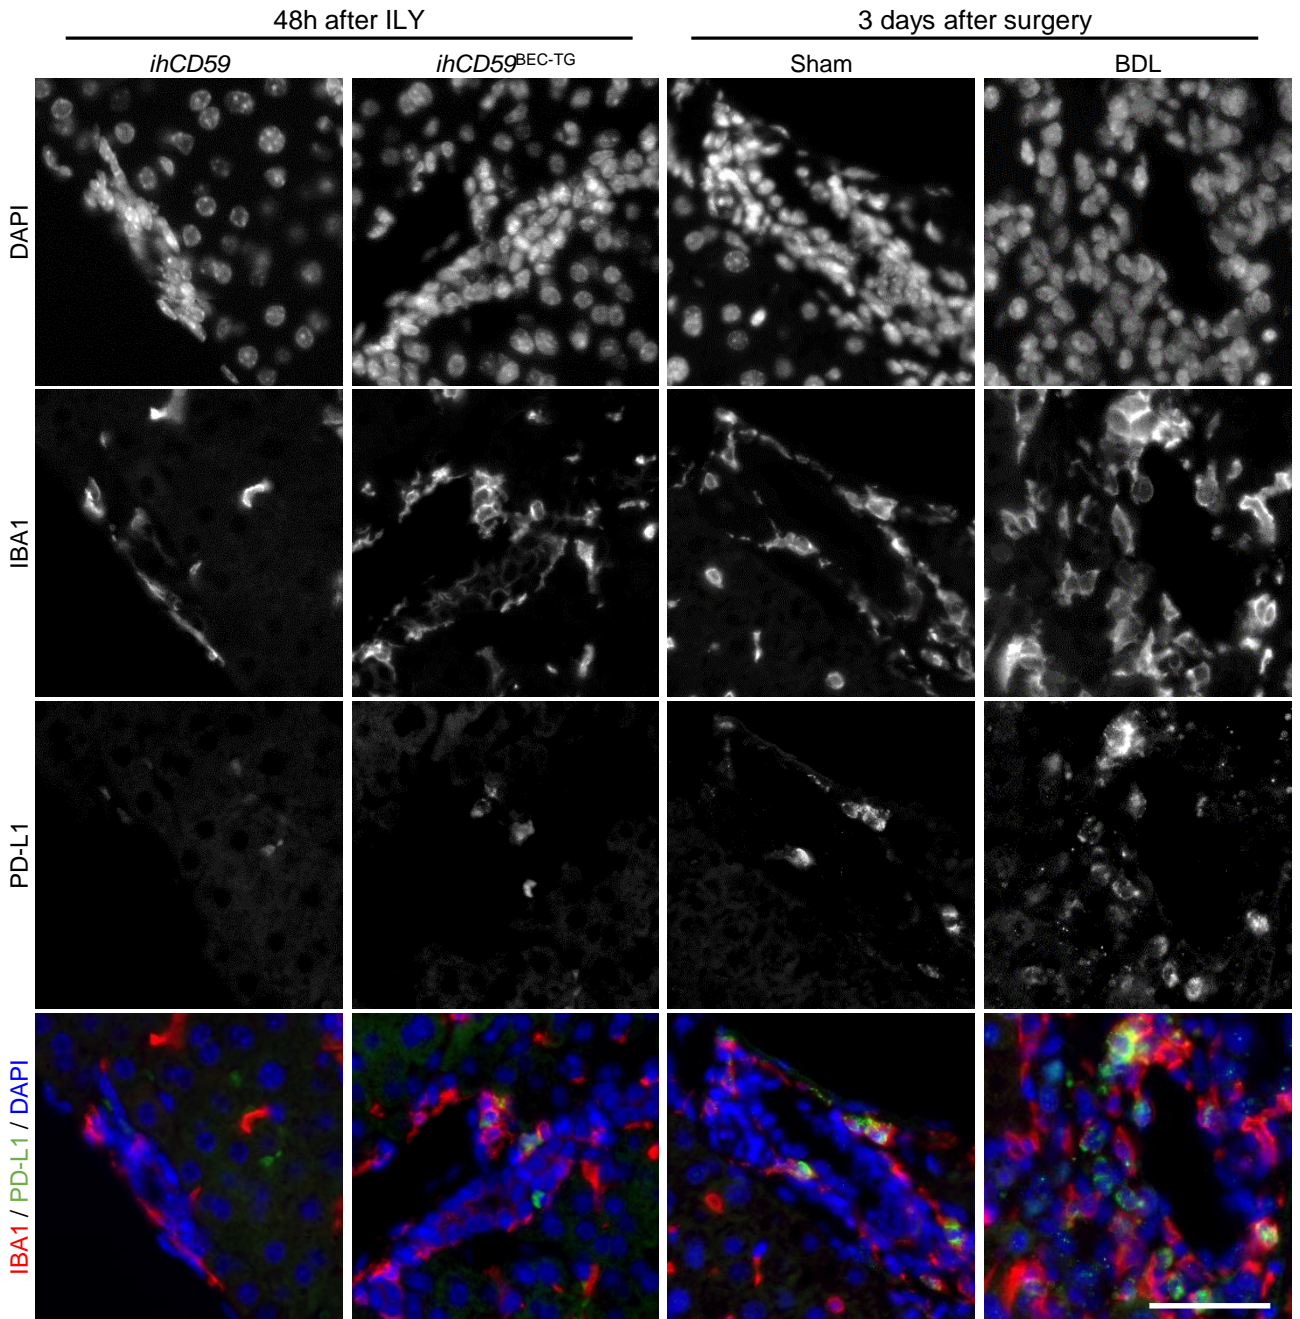

**Supplementary Figure 23: PD-L1<sup>+</sup> macrophages accumulate around bile ducts**

Liver FFPE section from mice that were injected with ILY and killed 48 hours later, or 3 days after sham or BDL-surgery, were subjected to IBA1 (red) and PD-L1 (green) immunostaining. Corresponding single channel pictures from Figure 4D are shown. Scale bar: 50  $\mu$ m.

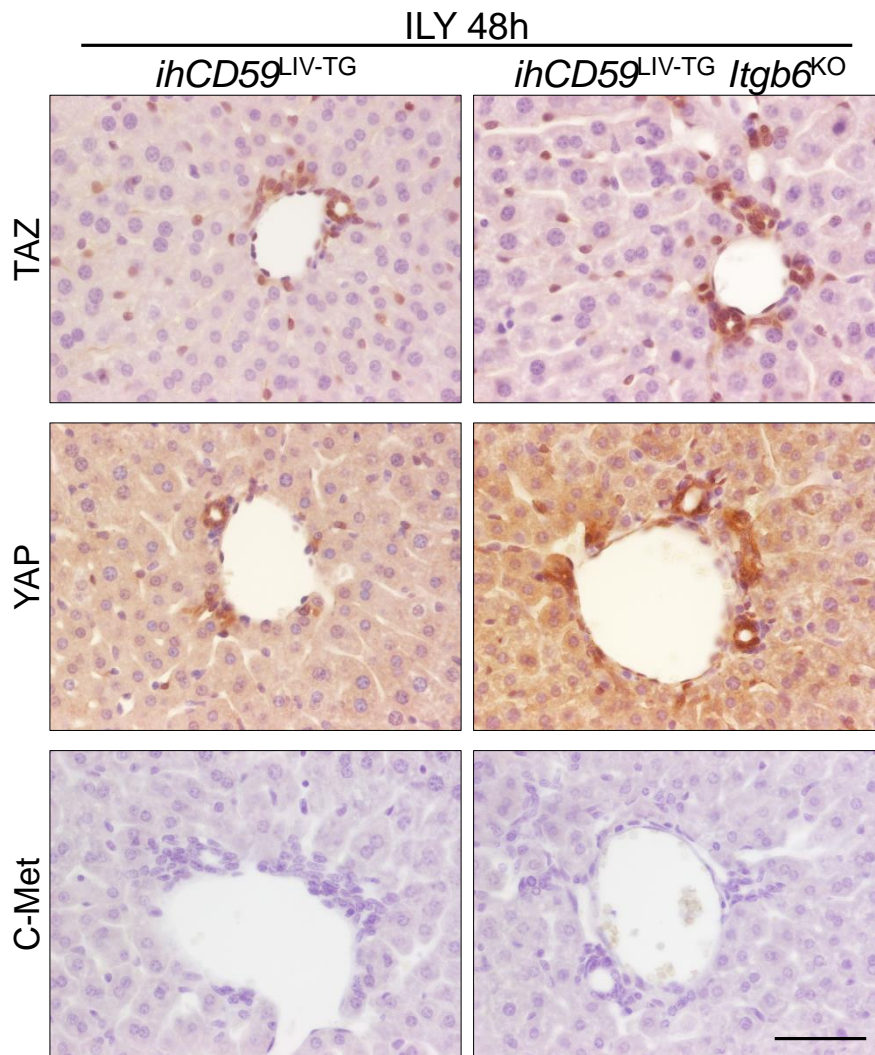

**Supplementary Figure 24: YAP/TAZ and cMet signaling are not altered in *ihCD59*<sup>LIV-TG</sup> *Itgb6*<sup>KO</sup> animals**

Liver FFPE section from *ihCD59*<sup>LIV-TG</sup>, or *ihCD59*<sup>LIV-TG</sup> *Itgb6*<sup>KO</sup> mice sacrificed 48 hours after ILY injection, were stained for TAZ, YAP, and cMet. Scale bar: 100  $\mu$ m.

| Antigen           | Application(s) | Manufacturer                                          | Catalog #   | Host species      | Dilution |
|-------------------|----------------|-------------------------------------------------------|-------------|-------------------|----------|
| <b>BrdU</b>       | IHC-P          | BD Biosciences, San Jose, CA                          | 550803      | Biotin-conjugated | 1/20     |
| <b>BrdU</b>       | IHC-P          | Abcam, Cambridge, UK                                  | 6326        | Rat               | 1/200    |
| <b>c-MET</b>      | IHC-P          | R&D Systems, Minneapolis, MN                          | AF2480      | Rabbit            | 1/200    |
| <b>CCR2</b>       | FC             | BioLegend, San Diego, CA                              | 150604      | Rat               | 1/200    |
| <b>CD11b</b>      | FC             | BD Biosciences, San Jose, CA                          | 550993      | Rat               | 1/200    |
| <b>CD11b</b>      | FC             | ThermoFisher Scientific, Carlsbad, CA                 | 45-0112-82  | Rat               | 1/200    |
| <b>CD3</b>        | FC             | BioLegend, San Diego, CA                              | 100216      | Rat               | 1/200    |
| <b>CD4</b>        | FC             | ThermoFisher Scientific, Carlsbad, CA                 | 47-0042-80  | Rat               | 1/200    |
| <b>CD8a</b>       | FC             | BD Biosciences, San Jose, CA                          | 553031      | Rat               | 1/200    |
| <b>CD45</b>       | FC             | ThermoFisher Scientific, Carlsbad, CA                 | 25-0451-82  | Rat               | 1/200    |
| <b>CD45</b>       | FC             | ThermoFisher Scientific, Carlsbad, CA                 | 69-0451-82  | Rat               | 1/200    |
| <b>CK19</b>       | IHC-P, xMD     | Developmental Studies Hybridoma Bank, Iowa City, IA * | TROMA-III   | Rat               | 1/4      |
| <b>CLEC4F</b>     | IHC-P          | R&D Systems, Minneapolis, MN                          | MAB2784     | Rat               | 1/200    |
| <b>Desmin</b>     | IHC-P          | Abcam, Cambridge, UK                                  | ab15200     | Rabbit            | 1/100    |
| <b>F4/80</b>      | FC             | ThermoFisher Scientific, Carlsbad, CA                 | 12-4801-82  | Rat               | 1/200    |
| <b>F4/80</b>      | IHC-P          | Bio-Rad , Hercules, CA                                | MCA497R     | Rat               | 1/500    |
| <b>GFP</b>        | IHC-P          | Cell Signaling , Danvers, MA                          | 2955        | Mouse             | 1/100    |
| <b>GFP</b>        | IHC-P          | Cell Signaling , Danvers, MA                          | 2956        | Rabbit            | 1/400    |
| <b>IBA1</b>       | IHC-P          | VWR, Arlington Heights, IL                            | 100369-764  | Rabbit            | 1/1,000  |
| <b>IBA1</b>       | IHC-P          | Millipore Sigma, St. Louis, MO                        | MABN92-25UG | Mouse             | 1/500    |
| <b>ITGB6</b>      | IHC-P          | ProteinTech, Chicago, IL                              | 19695       | Rabbit            | 1/100    |
| <b>Ki67</b>       | ICC            | Dako by Agilent, Santa Clara, CA                      | M7249       | Rat               | 1/100    |
| <b>Ly6C</b>       | FC             | BioLegend, San Diego, CA                              | 128024      | Rat               | 1/200    |
| <b>Ly6G / Gr1</b> | IHC-P          | BioXCell, West Lebanon, NH                            | BE0075      | Rat               | 1/100    |
| <b>Ly6G / Gr1</b> | FC             | ThermoFisher Scientific, Carlsbad, CA                 | 17-9668-80  | Rat               | 1/200    |
| <b>Ly6G / Gr1</b> | FC             | ThermoFisher Scientific, Carlsbad, CA                 | 48-9668-82  | Rat               | 1/200    |
| <b>MHC-II</b>     | FC             | ThermoFisher Scientific, Carlsbad, CA                 | 47-5321-82  | Rat               | 1/200    |
| <b>MPO</b>        | IHC-P          | Biocare Medical , Concord, CA                         | PP023AA     | Rabbit            | RTU      |
| <b>panCK</b>      | IHC-P          | Cell Signaling , Danvers, MA                          | 4545        | Mouse             | 1/500    |
| <b>panCK</b>      | IHC-P          | Agilent Dako, Santa Clara, CA                         | Z0622       | Rabbit            | 1/200    |
| <b>PD-L1</b>      | IHC-P          | Cell Signaling , Danvers, MA                          | 649885      | Rabbit            | 1/200    |
| <b>RFP</b>        | IHC-P          | Rockland, PA                                          | 600-401-379 | Rabbit            | 1/250    |
| <b>TAZ</b>        | IHC-P          | Cell Signaling , Danvers, MA                          | 72804       | Rabbit            | 1/200    |
| <b>YAP</b>        | IHC-P          | Cell Signaling , Danvers, MA                          | 14074       | Rabbit            | 1/400    |
| <b>α-SMA</b>      | IHC-P          | Agilent Dako, Santa Clara, CA                         | M085129-2   | Mouse             | 1/200    |

### Supplementary Table 1: Primary antibodies used in this study

FC: Flow cytometry; IHC-P: immunohistochemistry paraffin sections; xMD: expression microdissection. The monoclonal anti-mouse cytokeratin-19 (CK19/TROMA-III) antibody developed by R. Kemler, was obtained from the Developmental Studies Hybridoma Bank developed under the auspices of the NICHD and maintained by The University of Iowa, Department of Biology (Iowa City, IA 52242).



| Gene symbol            | Accession number | Forward                                | Reverse                            |
|------------------------|------------------|----------------------------------------|------------------------------------|
| <b>18S</b>             | NM_003278        | 5' - AACTTTCgATggTAgTCgCCgT - 3'       | 5' - TCCTTggATgTggTAgCCgTTT - 3'   |
| <b>Acta2</b>           | NM_007392.3      | 5' - AACAgCATCATgAAGTgATATTgACATC - 3' | 5' - gCTgATCCACATCTgCTggAAgg - 3'  |
| <b>Afp</b>             | NM_007423.4      | 5' - TgACAACAaggAggAgTgCTTCCA - 3'     | 5' - AATggTTgTTgCCTggAggTTTCg - 3' |
| <b>Angpt2</b>          | NM_007426.4      | 5' - AgCCCCTACATgTCCAATgC - 3'         | 5' - TTgTgCTgCTgTCTggTTCA - 3'     |
| <b>Ccl2</b>            | NM_011333.3      | 5' - TCTGGACCCATTCTTCTTGG - 3'         | 5' - TCAGCCAGATGCAGTTAACGC - 3'    |
| <b>Cd133</b>           | NM_008935.2      | 5' - CCCTCCAgCAAACAAGCAAC - 3'         | 5' - ACAgCCggAAGTAAgAgCAC - 3'     |
| <b>Col1a1</b>          | NM_007742        | 5' - gAAACCgCaggTATgCTTgA - 3'         | 5' - gACCaggAggACCAggAAgT - 3'     |
| <b>Col3a1</b>          | NM_009930.2      | 5' - TAggACTgACCAAggTggCT - 3'         | 5' - ggAACCTggTTTCTTCTCACC - 3'    |
| <b>Col5a2</b>          | NM_007737.2      | 5' - CATggAgAAggTTTCCAAATg - 3'        | 5' - AAAgCCCAggAACAAgAgAA - 3'     |
| <b>Cyp7a1</b>          | NM_007824.2      | 5' - ATTCATACCTgggCTgTgC - 3'          | 5' - CTgTgTCCAAATgCCTTCgC - 3'     |
| <b>Cyp8b1</b>          | NM_010012.3      | 5' - TCCTCagggTggTACAggAg - 3'         | 5' - CgggTTgAggAACcGATCAT - 3'     |
| <b>Eln</b>             | NM_007925.4      | 5' - ATAAAACgAggCgCTgAgAg - 3'         | 5' - CTCcAggACCTgCTCCAAAC - 3'     |
| <b>Entpd2</b>          | NM_009849.2      | 5' - ATgCgCCTACTCAACCTgAC - 3'         | 5' - AgCaggTAgTTggCagTCAC - 3'     |
| <b>Fxr</b>             | NM_001163700.1   | 5' - ggCTgCAAAggTTTCTTCCg - 3'         | 5' - ACACTggATTTCagTAAACAAACC - 3' |
| <b>Fn1</b>             | NM_010233.2      | 5' - gACCCTTACACggTTTCCCA - 3'         | 5' - ACgTTgCTTCATggggATCA - 3'     |
| <b>Gpbar1 (TGR5)</b>   | NM_174985.1      | 5' - CgATgTACCCTCAACCCTgg - 3'         | 5' - ACgCTCATAggCCAAGACTg - 3'     |
| <b>Hif1a</b>           | NM_001313919.1   | 5' - TggACTTgTCTCTTCTCCgC - 3'         | 5' - TTTTCTCTCgTTCTCgCCg - 3'      |
| <b>Il1b</b>            | NM_008361        | 5' - CTCCACCTCAATggACAgAA - 3'         | 5' - gCCgTCTTTCATTACACAgg - 3'     |
| <b>Il6</b>             | NM_013693        | 5' - gAACAACgATgATgCACTTgC - 3'        | 5' - TCCAggTAGCTATggTACTCC - 3'    |
| <b>Ifng</b>            | NM_008337        | 5' - ggCCATCagCAACAACATAAgCgT - 3'     | 5' - TgggTTgTTgACCTCAAACCTggC - 3' |
| <b>Itgb1</b>           | NM_010578.2      | 5' - ggACgCTgCgAAAAgATgAA - 3'         | 5' - CCACAATTTggCCCTgCTTg - 3'     |
| <b>Itgb5</b>           | NM_001145884.1   | 5' - gCCCGTTATgAAATggCCTC - 3'         | 5' - CTACCAggTCCCTTAgggCT - 3'     |
| <b>Itgb6</b>           | NM_021359.3      | 5' - ACggCTTCCAgCTTTggTC - 3'          | 5' - ACAGgTgggTgAAATTCTCCTg - 3'   |
| <b>Itgb8</b>           | NM_177290.3      | 5' - ACTgggCCAAAgTgAACACA - 3'         | 5' - ACTgAgACTTCTCCggTgT - 3'      |
| <b>Lta</b>             | NM_010735.2      | 5' - AgCagCATCTTCTAAgCCCT - 3'         | 5' - gTCATgTggAgAACCTgCTgTg - 3'   |
| <b>Ltb</b>             | NM_008518.2      | 5' - CAgCTgCggATTCTACACCA - 3'         | 5' - CATCCAAgCgCCTATgAggT - 3'     |
| <b>Osm</b>             | NM_001013365.2   | 5' - gAgCCCTATATCCgCCTCCA - 3'         | 5' - AgCTTTggAAAAgCCggAGT - 3'     |
| <b>Pkm2</b>            | NM_001253883.1   | 5' - CCCgCAACACTggCATCATTTgTA - 3'     | 5' - TgCAAAGCTTCTgTggCTTCAG - 3'   |
| <b>Tgfb1</b>           | NM_011577        | 5' - TgCgCTTgCagAgATTAAAA - 3'         | 5' - CTgCCgTACAACCTCCAgTgA - 3'    |
| <b>Tgfb2</b>           | NM_009367.3      | 5' - TCCCCTCCgAAAAgCCATC - 3'          | 5' - TgCTATCgATgTAgCgCTgg - 3'     |
| <b>Thy1</b>            | NM_009382.3      | 5' - AACCAAAACCTTCgCCTggAC - 3'        | 5' - AAgCTCACAAAAGTAgTCgCCC - 3'   |
| <b>Tnfa</b>            | NM_013693        | 5' - AATggCCTCCCTCTCATCAgTT - 3'       | 5' - CCACTTggTggTTTgCTACgA - 3'    |
| <b>Tweak (Tnfsf12)</b> | NM_011614.3      | 5' - AATCAACAgCTCCAgCCCTC - 3'         | 5' - gATCCgAAgggAAgACCCTg - 3'     |

**Supplementary Table 3: Oligonucleotides used for quantitative RT-PCR**
